# Supplementary material for: Comparative Oncogenomics Identifies PSMB4 and SHMT2 as Potential Cancer Driver Genes
Source: Oxford University Press journal article supplement (doi:10.1158/0008-5472.can-13-2683), 2014-04-23
Supplement: 00085472can132683-sup-tab2.xlsx [file 00085472can132683-sup-tab2.xlsx]

## Sheet: Breast(all)_Gain
	Cytoband	Peak Boundary	Q-value	Frequency	Avg. Copy number	Genes	Total Genes	PADGE	Total PADGE
1	1p34.2	chr1:39791405-39901372	0.0010608	0.278788	2.76729	HEYL, NT5C1A, PABPC4, SNORA55	4
2	1q23.3	chr1:159184320-159399953	1.8704e-31	0.787879	2.85975	ARHGAP30, DEDD, F11R, ITLN2, KARCA1, NIT1, PFDN2, PVRL4, UFC1, USF1, USP21	11	F11R, ARHGAP30, PVRL4, KARCA1, PFDN2, UFC1, USP21	7
3	1q32.1	chr1:203378235-204703372	1.3786e-25	0.763636	2.75359	ADVI28976, AVPR1B, C1orf186, CTSE, ELK4, FLJ32569, GCUD2, KLHDC8A, LEMD1, LOC732231, MFSD4, NUAK2, NUCKS1, PCTK3, RAB7L1, RIPK5, SLC26A9, SLC41A1, SLC45A3, SRGAP2, TGAG18920, TMCC2	22	NUAK2, C1orf186, TGAG18920	3
4	2p23.2	chr2:27910985-28205611	0.17994	0.327273	2.38993	BRE, RBKS	2
5	3q29	chr3:198097078-199501827	4.8899e-05	0.424242	2.51867	AGPH29159, AYLG29162, BDH1, DKFZP586B0319, DLG1, FYTTD1, IQCG, KIAA0226, LMLN, LOC152217, LOC339493, LOC391609, LOC440995, LOC643052, LOC728210, LOC728236, LOC728262, LRCH3, MFI2, NCBP2, PDCD6, PIGZ, RPL35A, SENP5	24	AGPH29159, DKFZP586B0319, PDCD6, LOC728262	4
6	5p15.1	chr5:16920642-17979701	1.7106e-05	0.460606	2.49445	BASP1, FLJ34047, LOC285563, LOC285697, LOC340096, LOC377242, LOC391746, LOC391747, LOC391749, LOC391761, LOC391763, LOC402199, LOC642127, LOC646103, MYO10	15	MYO10, BASP1	2
7	6p22.3	chr6:18224882-18510069	0.00057551	0.351515	2.58929	AOF1, DEK, IBRDC2, NHLRC1, TPMT	5
8	6q21	chr6:107281316-107951302	1.7106e-05	0.218182	3.29426	C6orf203, KIAA1553, LOC654119, PDSS2	4	PDSS2	1
9	7p22.1	chr7:6047038-6620883	1.9282e-06	0.466667	2.55564	C7orf26, DAGLBETA, EIF2AK1, FLJ20306, GRID2IP, KDELR2, MGC12966, PSCD3, RAC1, USP42, ZDHHC4	11	KDELR2	1
10	7q34	chr7:139589313-140327892	0.00011395	0.484848	2.44396	ADCK2, BRAF, DENND2A, LOC402301, MKRN1, NDUFB2, RAB19B, SLC37A3	8
11	8p12	chr8:38245105-38346015	5.7419e-22	0.339394	3.90506	PPAPDC1B, WHSC1L1, WVIR8870	3	PPAPDC1B, WHSC1L1	2
12	8q24.21	chr8:128470586-128989028	1.0722e-44	0.690909	3.38426	MYC, POU5F1, PVT1	3
13	9q34.11	chr9:129297353-129648133	0.03483	0.357576	2.41393	C9orf117, C9orf88, CDK9, ENG, FPGS, LRSAM1, PTRH1, SH2D3C, STXBP1, TOR2A, TTC16	11	TOR2A	1
14	10p13	chr10:13182949-13362936	1.1149e-06	0.412121	2.62749	C10orf49, MCM10, OPTN, PHYH	4	MCM10	1
15	11p13	chr11:35628537-37132462	0.0014234	0.230303	2.83349	C11orf55, C11orf74, COMMD9, FLJ14213, LDLRAD3, RAG1, RAG2, TRAF6, TRIM44	9	LDLRAD3	1
16	11q13.2	chr11:68943549-69131639	1.0569e-26	0.478788	3.38998
17	11q14.1	chr11:77771344-77960122	4.339e-07	0.30303	3.01016	GAB2, LOC732119, NARS2	3
18	12p13.33	chr12:938872-1545423	0.00030532	0.345455	2.62709	ERC1, FBXL14, RAD52	3
19	12q15	chr12:67938056-68275906	1.2003e-05	0.327273	2.77987	CCT2, CPSF6, FRS2, LYZ, YEATS4	5	LYZ	1
20	14q22.1	chr14:49043527-49308059	0.0016398	0.315152	2.61011	C14orf104, KLHDC1, KLHDC2, MGAT2, POLE2, PPIL5, RN7SL1, RPL36AL, RPS29	9	PPIL5, POLE2	2
21	15q26.1	chr15:88171183-88914926	0.14992	0.266667	2.61809	CIB1, CRTC3, GABARAPL3, IDH2, IQGAP1, LOC390637, PRSH12680, SEMA4B, ZNF710, ZNF774	10	ZNF710, IDH2, CIB1	3
22	16p11.2	chr16:29168353-30371479	1.8056e-10	0.593939	2.55735	ALDOA, ASPHD1, BOLA2, C16orf53, C16orf54, CCDC95, CD2BP2, CDIPT, CORO1A, DOC2A, FAM57B, FLJ25404, GDPD3, HIRIP3, KCTD13, KIF22, LOC124446, LOC440356, LOC653808, LOC730809, MAPK3, MAZ, MVP, MYLPF, PPP4C, PRRT2, QPRT, QSSP29924, RUNDC2B, SEPHS2, SEPT1, SEZ6L2, SPN, SULT1A3, SULT1A4, TAOK2, TBC1D10B, TBX6, WYKI36890, XTP3TPA, YPEL3, ZNF553, ZNF771	43	BOLA2, X244766_at, SPN, QPRT, KIF22, MAZ, PRRT2, C16orf53, MVP, SEZ6L2, KCTD13, TAOK2, FAM57B, ALDOA, PPP4C, MAPK3, CORO1A, QSSP29924, MYLPF, SEPT1, XTP3TPA, SEPHS2	22
23	17p13.3	chr17:2000814-2022855	4.8332e-06	0.284848	2.98989	SMG6	1
24	17q11.2	chr17:24451872-24708418	2.059e-13	0.363636	3.1704	CRYBA1, FQRL8375, MYO18A, NUFIP2	4	NUFIP2	1
25	17q12	chr17:35087535-35138309	1.4376e-133	0.545455	7.96498	ERBB2, PERLD1	2	PERLD1, ERBB2	2
26	17q21.32	chr17:44498211-44632650	6.2691e-25	0.448485	3.46847	B4GALNT2	1
27	17q23.1	chr17:55322992-55587936	3.2775e-30	0.509091	3.4121	ABC1, AP1S2, CA4, LOC51136, RPS6KB1, TUBD1, Zdsc1	7	ABC1, Zdsc1	2
28	17q25.3	chr17:74100052-74743375	5.8012e-12	0.472727	2.74482	C1QTNF1, CANT1, FLJ21865, LGALS3BP, LOC146713, LOC284120, LOC732206, PSCD1, TIMP2, USP36	10	LOC284120, PSCD1, LGALS3BP, CANT1	4
29	19p13.11	chr19:18068325-18359524	9.6327e-05	0.412121	2.5135	FKSG24, GDF15, IFI30, JUND, KIAA1683, LSM4, MAST3, PDE4C, PGPEP1, PIK3R2, RAB3A, SSRT30097	12	PIK3R2, IFI30, RAB3A, PDE4C, LSM4, GDF15	6
30	19q13.13	chr19:42880637-43499497	3.5848e-07	0.460606	2.58979	C19orf33, DFIS30116, DPF1, LOC541469, PPP1R14A, SIPA1L3, SPINT2, WDR87, YIF1B, ZNF573, ZNF607	11	SIPA1L3, SPINT2, LOC541469, C19orf33, YIF1B	5
31	20q13.2	chr20:51611474-51941865	1.9193e-21	0.569697	2.93668	RP4-724E16.2, ZNF217	2	TOMM40, APOE, APOC1, CLPTM1, LOC284352, RTN2, OPA3, SNRPD2, SYMPK, PPP5C, FLJ10781, CALM3, SLC1A5, AP2S1, SAE1, DHX34, LIG1, EMP3, KDELR1, SPHK2, RUVBL2, DHRS10, PLEKHA4, BAX, GYS1, SNRP70, FLJ10490, CD37, TEAD2, SR.A1, BCL2L12, PRMT1, CPT1C	1
32	21q22.13	chr21:37089575-37633116	0.012129	0.381818	2.41989	DSCR3, DSCR6, DSCR9, HLCS, PIGP, TTC3	6
33	22q12.2	chr22:28770243-28939386	0.01736	0.339394	2.47698	HORMAD2	1
							266		72

## Sheet: Breast(all)_Loss
	Cytoband	Wide Peak Boundary	Q-value	Frequency	Avg. Copy Number	Genes	Total GNE Genes	PADGE	Total PADGE
1	1p36.31	chr1:4858360-5632866	1.981e-06	0.490909	1.61881
2	1p21.3	chr1:95583891-97148419	7.8082e-08	0.551515	1.62054	LFPA31762, LOC284555, PTBP2	3	LOC284555, PTBP2	2
3	2q22.1	chr2:138528239-139002068	0.1586	0.406061	1.66516	LOC339745	1	LOC339745	1
4	3p12.3	chr3:77475226-77758989	1.0746e-15	0.575758	1.55132	ROBO2	1	ROBO2	1
5	4p15.2	chr4:26837084-28493240	7.2235e-14	0.581818	1.56293
6	4q34.1	chr4:176077870-176809920	1.4559e-06	0.490909	1.60807	ADAM29, GPM6A	2	ADAM29, GPM6A	2
7	5q14.3	chr5:87510581-89961027	2.0901e-14	0.557576	1.55394	CETN3, DKFZp727I021, GPR98, HSPC101, LOC153364, LYSMD3, MEF2C, POLR3G, TMEM161B	9	TMEM161B, X230902_at, MEF2C, CETN3, HSPC101, LOC153364, POLR3G, DKFZp727I021, GPR98	9
8	5q34	chr5:161722216-162999770	1.1486e-05	0.454545	1.61328	CCNG1, HMMR, MAT2B, NUDCD2	4	NUDCD2, HMMR, MAT2B	3
9	6p25.3	chr6:1435872-1474482	0.00058995	0.393939	1.59416
10	6q14.1	chr6:81072795-81576909	1.1492e-11	0.509091	1.54637	BCKDHB, LOC340171, LOC648934	3	LOC340171	1
11	6q27	chr6:166640395-167257131	1.7279e-12	0.527273	1.55457	ALMV29339, BRP44L, MGC35308, RPS6KA2, SFT2D1	5	MGC35308, SFT2D1, ALMV29339, BRP44L, RPS6KA2	5
12	8p22	chr8:10309769-17018352	9.7931e-59	0.763636	1.40813	AMAC1L2, BLK, C8orf13, C8orf15, C8orf48, C8orf5, C8orf74, CTSB, DEFB130, DEFB134, DEFB136, DEFB137, DLC1, DUB3, EFHA2, FAM86B1, FDFT1, FGF20, FLJ37098, GATA4, IPLS36597, KIAA1456, LOC157740, LOC377632, LOC440053, LOC442381, LOC646253, LOC649294, LOC649396, LOC729732, LOC731146, LONRF1, MSR1, MSRA, MTMR9, NEIL2, PINX1, RP1L1, SGCZ, SOX7, TCTF36553, TDH, TUSC3, UNQ9391, XKR6	45	MSRA, PINX1, XKR6, C8orf5, C8orf15, LOC157740, MTMR9, TDH, C8orf13, BLK, GATA4, NEIL2, FDFT1, CTSB, LOC440053, DUB3, FAM86B1, TCTF36553, IPLS36597, C8orf48, MSR1, FGF20	22
13	9p21.3	chr9:21822729-22236764	1.4318e-34	0.563636	1.40195	ANRIL, C9orf53, CDKN2A, CDKN2B, MTAP	5	MTAP, C9orf53, CDKN2A, ANRIL, CDKN2B	5
14	10q23.31	chr10:89791068-90035208	7.2219e-11	0.472727	1.53634	C10orf59	1	C10orf59	1
15	11p15.4	chr11:4005782-6154146	5.5594e-08	0.527273	1.6121	C11orf40, GGFG32087, HBE1, LOC119684, LOC196120, LOC390031, LOC390033, LOC441584, LOC643753, MGC20470, MMP26, OR51A1P, OR51A7, OR51B2, OR51B4, OR51B5, OR51B6, OR51D1, OR51E1, OR51F1, OR51F2, OR51G1, OR51G2, OR51I1, OR51I2, OR51J1P, OR51L1, OR51M1, OR51Q1, OR51S1, OR51T1, OR51V1, OR52A1, OR52A4, OR52A5, OR52B2, OR52B4, OR52B6, OR52D1, OR52E2, OR52E4, OR52E6, OR52E8, OR52H1, OR52I1, OR52I2, OR52J3,…	72	STIM1, RRM1, TRIM21, OR52K3P, OR51E1, PSGR, MMP26, X221329_at, OR51A1P, HBE1, OR51B4, OR51B2, OR51B5, OR51B6, OR51M1, OR51J1P, OR51I1, OR51I2, GGFG32087, OR52D1, UBQLN3, MGC20470, X223599_at, TRIM5, TRIM22	25
16	11q25	chr11:131434660-131710317	1.0237e-20	0.6	1.50869	HNT	1	HNT	1
17	13q21.1	chr13:54373781-54876984	4.1218e-21	0.612121	1.51305
18	14q31.1	chr14:80032853-80953688	3.4797e-11	0.569697	1.59367	C14orf145, GTF2A1, QILT37243, SNORA79, SQLG31227, STON2, TSHR, UNGP3	8	C14orf145, TSHR, SQLG31227, QILT37243, GTF2A1, STON2	6
19	15q14	chr15:34944142-35786031	7.8876e-12	0.563636	1.57995	LOC145845, MEIS2	2	LOC145845	1
20	16q21	chr16:60462191-61700527	2.5667e-12	0.466667	1.50322	CDH8	1	CDH8	1
21	17p13.3	chr17:2022857-2164416	3.5777e-13	0.630303	1.60161	LOC440396, SMG6, SRR	3	SMG6, SRR	2
22	17p12	chr17:11774475-12399601	2.4296e-35	0.709091	1.4855	DNAH9, MAP2K4, ZNF18	3	DNAH9, ZNF18, MAP2K4	3
23	17q12	chr17:29305218-29676742	5.4438e-12	0.527273	1.55724	ACCN1, CCL11, CCL2, CCL7, CCL8, LOC732093	6	ACCN1, CCL2, CCL7, CCL11, CCL8	5
24	17q21.31	chr17:40519392-42639029	2.9379e-07	0.490909	1.60623	ACBD4, AQHS31423, ARHGAP27, ARL17P1, C17orf46, CDC27, CRHR1, FMNL1, GOSR2, HEXIM1, HEXIM2, IMP5, KIAA1267, LOC201175, LOC374808, LOC474170, LOC644172, LOC644191, LOC644253, LOC644264, LOC644297, LOC644397, LOC652203, LOC652627, LOC728762, LOC728863, LOC728871, LOC729008, LOC731128, LRRC37A, MAP3K14, MAPT, MGC57346, NFYQ36667, NMT1, NSF, PLCD3, PLEKHM1, RPRML, STH, VVPT31421, WNT3, WNT9B, YIML31419	44	NMT1, PLCD3, ACBD4, YIML31419, HEXIM1, HEXIM2, FMNL1, MAP3K14, ARHGAP27, PLEKHM1, LOC652203, AQHS31423, CRHR1, IMP5, MAPT, KIAA1267, LOC644253, LOC644264, X243899_at, LRRC37A, NSF, ARL17P1, NFYQ36667, WNT3, GOSR2, CDC27	26
25	18q22.3	chr18:71041019-71272615	4.7932e-14	0.527273	1.53623	DKFZP434C0826, LOC284274, TSHZ1, ZADH2	4	ZADH2, TSHZ1, DKFZP434C0826	3
26	19p13.3	chr19:1-3114661	0.23589	0.339394	1.648	ABCA7, ADAMTSL5, AES, AMH, AP3D1, APC2, ARID3A, ATP5D, ATP8B3, AVDE37019, AZU1, BSG, BTBD2, C19orf19, C19orf20, C19orf21, C19orf22, C19orf23, C19orf24, C19orf25, C19orf26, C19orf34, C19orf35, C19orf36, C19orf6, CDC34, CFD, CIRBP, CNN2, CSNK1G2, DAZAP1, DIRAS1, DOT1L, EFNA2, ELA2, FAM108A1, FGF22, FLJ11535, FSTL3, GADD45B, GAMT, GNA11, GNA15, GNG7, GPX4, GRIN3B, GZMM, HCN2, HMHA1, JSRP1, KIAA0963,…	112	PPAP2C, MIER2, THEG, KIAA1957, SHC2, C19orf19, MADCAM1, C19orf20, BSG, CDC34, GZMM, HCN2, POLRMT, FGF22, RNF126, FSTL3, PALM, C19orf21, PTBP1, FLJ11535, AZU1, PRTN3, ELA2, THRAP5, C19orf22, KISS1R, ARID3A, LXVE8543, WDR18, GRIN3B, C19orf6, CNN2, ABCA7, HMHA1, POLR2E, GPX4, KIAA0963, STK11, C19orf26, ATP5D, MIDN, C19orf23, C19orf24, EFNA2, MUM1, NDUFS7, GAMT, DAZAP1, RPS15, APC2, C19orf25, PCSK4, …	99
27	20p12.1	chr20:14601663-15174689	0.23589	0.284848	1.60622	C20orf133, RPS10P2	2	RPS10P2	1
28	21q21.1	chr21:15176774-15536965	0.010729	0.309091	1.55896	C21orf116, NRIP1	2	NRIP1, C21orf116	2
29	22q13.31	chr22:46399779-46896116	3.0884e-10	0.472727	1.54342	LOC730841	1	LOC730841	1
30	Xp22.33	chrX:1-854412	0	0.993939	1.06873	GTPBP6, LOC652806, LOC652808, LOC652809, PLCXD1, PPP2R3B, SHOX	7	PLCXD1, GTPBP6, PPP2R3B, SHOX	4
31	Xq21.31	chrX:91645682-91712653	5.1668e-197	0.969697	1.21001	PCDH11X	1	TOMM40, APOE, APOC1, CLPTM1, LOC284352, RTN2, OPA3, SNRPD2, SYMPK, PPP5C, FLJ10781, CALM3, SLC1A5, AP2S1, SAE1, DHX34, LIG1, EMP3, KDELR1, SPHK2, RUVBL2, DHRS10, PLEKHA4, BAX, GYS1, SNRP70, FLJ10490, CD37, TEAD2, SR.A1, BCL2L12, PRMT1, CPT1C	1
32	Xq28	chrX:148935921-149363673	2.4776e-20	0.581818	1.50634	LOC389901	1
							349		233

## Sheet: Breast_HER2_Gain
	Cytoband	Wide Peak Boundary	Q-value	Frequency	Avg. Copy Number	Genes	Total GNE Genes	PADGE	Total PADGE
1	1p34.2	chr1:39791405-39908392	0.0045951	0.358491	3.10146	HEYL, NT5C1A, PABPC4, SNORA55	4
2	1q23.3	chr1:159052388-159256735	2.2534e-09	0.849057	2.85441	CD244, F11R, ITLN1, ITLN2, LY9	5	LY9, CD244, F11R	3
3	4q13.3	chr4:72839028-74149336	0.21863	0.207547	3.19847	ADAMTS3, COX18, GC, NPFFR2	4	NPFFR2	1
4	5p15.1	chr5:16740671-17979701	0.084274	0.509434	2.44057	BASP1, FLJ34047, LOC285563, LOC285697, LOC340096, LOC377242, LOC391746, LOC391747, LOC391749, LOC391761, LOC391763, LOC402199, LOC642127, LOC646103, MYO10	15	MYO10, BASP1	2
5	6p24.3	chr6:10163069-10481822	0.095847	0.358491	2.72917	LOC346096, OFCC1	2
6	6q21	chr6:107075974-107958126	0.0017999	0.264151	3.63805	AIM1, C6orf203, KIAA1553, LOC654119, PDSS2, QRSL1, RTN4IP1	7	PDSS2	1
7	7q11.22	chr7:67364830-67771229	0.01337	0.490566	2.56627
8	8p12	chr8:38281306-38647622	0.00025363	0.358491	3.27997	FGFR1, FLJ43582, LETM2, LOC732038, WHSC1L1	5	WHSC1L1	1
9	8q23.3	chr8:116841928-117382764	2.7514e-17	0.754717	3.80171
10	9q33.3	chr9:129146331-129648133	0.062086	0.471698	2.50993	C9orf117, C9orf88, CDK9, ENG, FPGS, GARNL3, LRSAM1, PTRH1, RPL12, SH2D3C, SLC2A8, SNORA65, STXBP1, TOR2A, TTC16, ZNF79	16	TOR2A	1
11	10p13	chr10:12765855-13362936	0.0054737	0.45283	2.76384	C10orf49, CAMK1D, CCDC3, MCM10, OPTN, PHYH	6	MCM10	1
12	11q13.3	chr11:69629476-69968688	1.75e-06	0.45283	3.27007	CTTN, FADD, PPFIA1, TMEM16A	4	FADD	1
13	12q15	chr12:67938056-68275906	0.095847	0.377358	2.67424	CCT2, CPSF6, FRS2, LYZ, YEATS4	5	LYZ	1
14	14q22.1	chr14:49028645-49943984	0.0036402	0.433962	2.77198	ARF6, ATP5S, C14orf104, C14orf138, CDKL1, FFAL36671, KLHDC1, KLHDC2, L2HGDH, LOC196913, LOC283551, MGAT2, POLE2, PPIL5, RN7SL1, RPL36AL, RPS29, SDCCAG1, SOS2	19	PPIL5, POLE2, L2HGDH	3
15	16p11.2	chr16:28012171-30293763	0.020667	0.584906	2.50711	A-761H5.5, ALDOA, APOB48R, ASPHD1, ATP2A1, ATXN2L, BOLA2, C16orf53, C16orf54, CCDC101, CCDC95, CD19, CD2BP2, CDIPT, CLN3, CORO1A, DOC2A, EIF3S8, FAM57B, FLJ25404, GDPD3, HIRIP3, IL27, KCTD13, KIF22, LOC124446, LOC390688, LOC440356, LOC653808, LOC728804, LOC728809, LOC730150, LOC730151, LOC730153, LOC730809, MAPK3, MAZ, MVP, MYLPF, NFATC2IP, NUPR1, PPP4C, PRRT2, QPRT, QSSP29924, RABEP2, RUNDC2B, S…	60	XPO6, SBK1, EIF3S8, CLN3, X236700_at, LOC390688, ATP2A1, RABEP2, CD19, X223173_at, BOLA2, X244766_at, SPN, QPRT, KIF22, MAZ, PRRT2, C16orf53, MVP, SEZ6L2, KCTD13, TAOK2, FAM57B, ALDOA, PPP4C, MAPK3, CORO1A, QSSP29924, MYLPF	29
16	17p13.3	chr17:2000814-2022855	0.014952	0.264151	3.42934	SMG6	1
17	17q11.2	chr17:24451872-24708418	1.6542e-10	0.528302	3.78001	CRYBA1, FQRL8375, MYO18A, NUFIP2	4	NUFIP2	1
18	17q11.2	chr17:27734659-27919599	9.3823e-05	0.301887	4.00101	CDK5R1, HHLS36710, MYO1D, PSMD11	4	PSMD11	1
19	17q12	chr17:35087535-35138309	1.833e-142	1	14.4555	ERBB2, PERLD1	2	PERLD1, ERBB2	2
20	17q21.32	chr17:44498211-44632650	5.3618e-18	0.584906	4.49789	B4GALNT2	1
21	17q21.33	chr17:46775028-47013637	3.8246e-14	0.603774	3.88331
22	17q23.1	chr17:55322992-55668265	1.3227e-15	0.679245	3.74399	ABC1, AP1S2, CA4, LOC51136, RPS6KB1, SCARNA20, TUBD1, USP32, Zdsc1	9	ABC1, Zdsc1	2
23	17q25.3	chr17:74100052-75287251	3.8472e-05	0.509434	2.95614	C1QTNF1, CANT1, FLJ21865, LGALS3BP, LOC146713, LOC284120, LOC732206, PSCD1, TIMP2, USP36	10	LOC284120, PSCD1, LGALS3BP, CANT1	4
24	19q13.13	chr19:42441470-43499497	4.8555e-05	0.490566	2.98874	C19orf33, DFIS30116, DPF1, HKR1, LOC541469, PPP1R14A, SIPA1L3, SPINT2, WDR87, YIF1B, ZFP30, ZNF527, ZNF540, ZNF569, ZNF570, ZNF571, ZNF573, ZNF607, ZNF781, ZNF793	20	SIPA1L3, SPINT2, LOC541469, C19orf33, YIF1B	5
25	20q13.31	chr20:54451274-55279535	3.6891e-08	0.716981	2.85812	BMP7, C20orf105, C20orf106, C20orf107, C20orf32, C20orf43, LOC339583, RPS4L, TFAP2C	9	C20orf105	1
26	21q21.1	chr21:16575432-17066444	0.036488	0.264151	2.84897	C21orf34	1
27	22q12.2	chr22:28909047-30300516	0.10745	0.415094	2.59229	AGTRL2, C22orf27, DRG1, DUSP18, EIF4ENIF1, Em:AC005003.4, EPAG16003, GAL3ST1, LIF, LIMK2, LOC200312, LOC550631, LOC652968, MORC2, MTP18, OSBP2, OSM, PES1, PIB5PA, PIK3IP1, PLA2G3, PSSS37174, RNF185, SEC14L2, SEC14L3, SEC14L4, SELM, SF3A1, SFI1, SLC35E4, SMTN, TBC1D10A, TCN2, TUG1, UNQ1945, VTAK22535, ZNF278	37	OSM, PSSS37174, MTP18, SEC14L3, EPAG16003, OSBP2, PIB5PA, PLA2G3, ZNF278	9
							250		69

## Sheet: Breast_HER2_Loss
	Cytoband	Wide Peak Boundary	Q-value	Frequency	Avg. Copy Number	Genes	Total GNE Genes	PADGE	Total PADGE
1	1p36.31	chr1:4858360-5632866	0.0034485	0.603774	1.6491
2	1p31.1	chr1:78203132-79659897	5.9688e-05	0.679245	1.61628	DNAJB4, ELTD1, FUBP1, GIPC2, IFI44, IFI44L, PTGFR	7	FUBP1, PTGFR, IFI44L, IFI44	4
3	3p12.3	chr3:77475226-81389870	1.1785e-07	0.679245	1.55945	LOC375355, ROBO1, ROBO2	3	ROBO2, ROBO1, LOC375355	3
4	4p15.1	chr4:29064552-35888648	8.4594e-06	0.679245	1.58399	CENTD1, LOC133185, PCDH7	3	PCDH7, CENTD1	2
5	4q21.21	chr4:82103676-83154037	0.068031	0.471698	1.60253	BMP3, C4orf22, PRKG2, RASGEF1B	4	C4orf22, BMP3, PRKG2, RASGEF1B	4
6	5q23.1	chr5:113777257-119162742	1.7551e-06	0.622642	1.60126	AP3S1, ATG12, CCDC112, CDO1, COMMD10, CTNNA1, DMXL1, DTWD2, FEM1C, FLJ90650, HSD17B4, KCNN2, LOC340069, LOC401206, LOC730581, PGGT1B, RVAG28856, SEMA6A, TNFAIP8, TRIM36, VKST37013	21	KCNN2, TRIM36, PGGT1B, CCDC112, CTNNA1, FEM1C, X228234_at, CDO1, ATG12, AP3S1, FLJ90650, COMMD10, SEMA6A, RVAG28856, DTWD2, DMXL1, TNFAIP8, VKST37013, HSD17B4	19
7	6q14.3	chr6:85494993-86469944	0.03824	0.509434	1.62092	NT5E, SNHG5, SNORD50A, SNX14, SYNCRIP, TBX18	6	TBX18, SNX14, SNORD50A	3
8	8p23.2	chr8:1-8498188	6.4201e-30	0.943396	1.36962	AGPAT5, ANGPT2, ARHGEF10, C8orf42, C8orf68, CLN8, DEFA4, DEFA5, DEFA6, DEFB1, DEFB103A, DEFB104A, DEFB105A, DEFB107A, DEFB4, DEFB4P, DKFZp761P0423, DLGAP2, Em:AF238378.7, ERICH1, FAM90A12, FAM90A14, FAM90A20, FAM90A24, FAM90A7, FAM90A8, FBXO25, FLJ00290, FLJ10661, hBD-6, KBTBD11, KIAA1890, LOC340406, LOC349196, LOC375638, LOC377606, LOC392188, LOC401442, LOC645402, LOC645489, LOC645627, LOC645836…	64	RQRK30839, ZNF596, X220399_at, LOC377606, FBXO25, FLJ00290, ERICH1, LOC375638, DLGAP2, CLN8, KIAA1890, MCPH1, ANGPT2, X230562_at, RTRE30845, AGPAT5, DEFA6, DEFA4, X205033_s_at, DEFA5, LOC340406, DEFB103A, SPAG11, SPAG11A, DEFB4, LOC392188, LOC645836, FLJ10661, DKFZp761P0423	29
9	8p12	chr8:34072416-34468949	9.8414e-24	0.90566	1.44899
10	9p21.3	chr9:21822729-22292222	9.4963e-11	0.622642	1.46348	ANRIL, C9orf53, CDKN2A, CDKN2B, MTAP	5	MTAP, C9orf53, CDKN2A, ANRIL, CDKN2B	5
11	10q21.1	chr10:58136704-60833543	0.061722	0.471698	1.59739	BICC1, FAM13C1, IPMK, PHYHIPL, TFAM, UBE2D1, ZCD1	7	IPMK, ZCD1, UBE2D1, TFAM, BICC1, PHYHIPL, FAM13C1	7
12	11p15.4	chr11:4005782-6154146	4.7206e-05	0.622642	1.59712	C11orf40, GGFG32087, HBE1, LOC119684, LOC196120, LOC390031, LOC390033, LOC441584, LOC643753, MGC20470, MMP26, OR51A1P, OR51A7, OR51B2, OR51B4, OR51B5, OR51B6, OR51D1, OR51E1, OR51F1, OR51F2, OR51G1, OR51G2, OR51I1, OR51I2, OR51J1P, OR51L1, OR51M1, OR51Q1, OR51S1, OR51T1, OR51V1, OR52A1, OR52A4, OR52A5, OR52B2, OR52B4, OR52B6, OR52D1, OR52E2, OR52E4, OR52E6, OR52E8, OR52H1, OR52I1, OR52I2, OR52J3,…	72	STIM1, RRM1, TRIM21, OR52K3P, OR51E1, PSGR, MMP26, X221329_at, OR51A1P, HBE1, OR51B4, OR51B2, OR51B5, OR51B6, OR51M1, OR51J1P, OR51I1, OR51I2, GGFG32087, OR52D1, UBQLN3, MGC20470, X223599_at, TRIM5, TRIM22	25
13	11q25	chr11:130934412-131710317	0.0010933	0.566038	1.58577	HNT	1	HNT	1
14	13q21.1	chr13:56508234-57913877	0.00046529	0.603774	1.60272	FLJ40296, PCDH17	2	PCDH17	1
15	15q14	chr15:33451309-37890332	0.0071124	0.603774	1.64816	ATPBD4, C15orf41, FAM98B, FLJ35695, FLJ39531, FSIP1, GPR176, IEFR36938, KRPF32640, LOC145845, MEIS2, RASGRP1, RFNC32212, SPRED1, THBS1, TMCO5	16	ATPBD4, C15orf41, LOC145845, RFNC32212, IEFR36938, RASGRP1, KRPF32640, THBS1, FSIP1, GPR176	10
16	16q23.3	chr16:80645053-82256373	8.8468e-05	0.471698	1.4912	CDH13, HSD17B2, MPHOSPH6	3	MPHOSPH6, CDH13	2
17	17p13.3	chr17:2022857-2167378	1.4905e-06	0.830189	1.62347	LOC440396, SMG6, SRR	3	SMG6, SRR	2
18	17p13.1	chr17:10036122-11423639	8.6409e-15	0.867925	1.52002	C17orf48, FLJ45455, GAS7, GREG6006, LOC284033, LOC388335, LOC728699, MYH1, MYH13, MYH2, MYH3, MYH4, MYH8, SCO1, TMET32643	15	MYH13, MYH8, MYH4, MYH1, MYH2, MYH3, SCO1, C17orf48, GREG6006, TMET32643, FLJ45455, LOC284033	12
19	17q12	chr17:29305218-29768751	2.0721e-10	0.660377	1.50573	ACCN1, CCL1, CCL11, CCL13, CCL2, CCL7, CCL8, LOC732093	8	ACCN1, CCL2, CCL7, CCL11, CCL8, CCL13, CCL1	7
20	17q21.32	chr17:40754148-42767584	9.8004e-08	0.773585	1.58845	AQHS31423, ARHGAP27, ARL17P1, C17orf57, CDC27, CRHR1, GOSR2, IMP5, ITGB3, KIAA1267, LOC201175, LOC374808, LOC474170, LOC644172, LOC644191, LOC644253, LOC644264, LOC644297, LOC644397, LOC652203, LOC652627, LOC728762, LOC728863, LOC728871, LOC729008, LOC731128, LRRC37A, MAPT, MGC57346, MYL4, NFYQ36667, NSF, PLEKHM1, RPRML, STH, WNT3, WNT9B	37	ARHGAP27, PLEKHM1, LOC652203, AQHS31423, CRHR1, IMP5, MAPT, KIAA1267, LOC644253, LOC644264, X243899_at, LRRC37A, NSF, ARL17P1, NFYQ36667, WNT3, GOSR2, CDC27, MYL4, ITGB3, C17orf57	21
21	17q22	chr17:48363260-49305090	0.00011274	0.45283	1.52886	KIF2B, LOC339209, LOC729283	3	KIF2B	1
22	18p11.22	chr18:9008170-10128889	5.3064e-06	0.490566	1.47335	ANKRD12, LOC125242, NDUFV2, PPP4R1, RAB31, RALBP1, RGEG31471, TWSG1, TXNDC2, VAPA	10	NDUFV2, RGEG31471, ANKRD12, TWSG1, RALBP1, PPP4R1, RAB31, TXNDC2, VAPA	9
23	22q13.31	chr22:45575324-49055522	0.061722	0.396226	1.57646	ALG12, BRD1, C22orf34, CRELD2, FAM19A5, FLJ41993, HDAC10, LOC150400, LOC376856, LOC642757, LOC644111, LOC728794, LOC730841, LOC731014, LOC731245, LOC90834, MAPK11, MAPK12, MLC1, MOV10L1, PANX2, PIM3, RP3-355C18.2, RP3-402G11.5, SRKK32649, TBC1D22A, TRABD, TUBGCP6, ZBED4	29	TBC1D22A, LOC730841, FAM19A5, SRKK32649, LOC150400, C22orf34, BRD1, LOC90834, ZBED4, ALG12, CRELD2, PIM3, MLC1, MOV10L1, PANX2, TRABD, RP3.402G11.5, TUBGCP6, HDAC10, MAPK12, MAPK11	21
24	Xp22.33	chrX:1-854412	3.878e-108	1	1.05699	GTPBP6, LOC652806, LOC652808, LOC652809, PLCXD1, PPP2R3B, SHOX	7	PLCXD1, GTPBP6, PPP2R3B, SHOX	4
25	Xq21.31	chrX:91640774-91712653	3.1861e-52	0.981132	1.26175	PCDH11X	1	PCDH11X	1
							327		193

## Sheet: Breast_TN_Gain
	Cytoband	Wide Peak Boundary	Q-value	Frequency	Avg. Copy Number	Genes	Total GNE Genes	PADGE	Total PADGE
1	1p34.2	chr1:41216307-43188666	0.14839	0.314815	2.62383	APAM28918, C1orf50, CCDC23, CLDN19, CTPS, EDN2, ERMAP, FAM80A, FOXJ3, GUCA2A, GUCA2B, HIVEP3, LEPRE1, LOC732258, LOC732276, PPCS, PPIH, RP4-692D3.1, SCMH1, SLC2A1, SLFNL1, YBX1, ZMYND12, ZNF691	24	CTPS, APAM28918, EDN2, GUCA2B, PPIH, LEPRE1, SLC2A1	7
2	1q23.3	chr1:159168758-159576936	1.7016e-12	0.740741	2.93981	ADAMTS4, APOA2, ARHGAP30, B4GALT3, DEDD, F11R, FCER1G, ITLN2, KARCA1, MPZ, NDUFS2, NIT1, NR1I3, PCP4L1, PFDN2, PPOX, PVRL4, SDHC, TOMM40L, UFC1, USF1, USP21	22	F11R, ARHGAP30, PVRL4, KARCA1, PFDN2, UFC1, USP21, B4GALT3, NDUFS2, FCER1G, TOMM40L, SDHC	12
3	1q32.1	chr1:203329666-204872693	1.7963e-09	0.722222	2.74525	ADVI28976, AVPR1B, C1orf186, CTSE, ELK4, FLJ32569, GCUD2, IKBKE, KLHDC8A, LEMD1, LGTN, LOC732231, MFSD4, NUAK2, NUCKS1, PCTK3, RAB7L1, RASSF5, RBBP5, RIPK5, SLC26A9, SLC41A1, SLC45A3, SRGAP2, TGAG18920, TMCC2	26	NUAK2, C1orf186, TGAG18920, RASSF5	4
4	2p15	chr2:61420029-61948800	0.081649	0.462963	2.48982	AAAG29006, CCT4, FLJ13305, LOC647082, LOC652265, USP34, XPO1	7
5	3q26.31	chr3:172942903-173932336	7.2718e-05	0.648148	2.60263	AADACL1, FNDC3B, GHSR, LOC375380, PLD1, TNFSF10, WPNS18320	7
6	5p15.1	chr5:16527197-17979701	0.021157	0.425926	2.63594	BASP1, FLJ20152, FLJ34047, LOC285563, LOC285697, LOC340096, LOC375438, LOC377242, LOC391746, LOC391747, LOC391749, LOC391761, LOC391763, LOC402199, LOC642127, LOC646103, MYO10	17	FLJ20152, MYO10, BASP1	3
7	6p21.1	chr6:43517820-44758470	0.0010694	0.5	2.66883	AARSL, ABCC10, C6orf154, C6orf206, CAPN11, CDC5L, EGFL9, GTPBP2, HSP90AB1, MAD2L1BP, MGC45491, MRPL14, MRPS18A, NFKBIE, POLH, POLR1C, RP11-444E17.2, SLC29A1, SLC35B2, SPATS1, Tcte1, TDSE28841, TJAP1, TMEM63B, VEGFA, XPO5, YIPF3	27	C6orf154, XPO5, VEGFA, MGC45491, MRPL14, TMEM63B, NFKBIE	7
8	6q23.3	chr6:135259325-136271707	0.00037399	0.407407	2.87456	AHI1, ALDH8A1, HBS1L, MYB, PDE7B, SCLE30759	6	MYB	1
9	7p11.2	chr7:55242307-55502817	0.0011664	0.407407	2.81904	EGFR, LANCL2	2
10	7q32.1	chr7:128468084-128881149	0.021157	0.518519	2.51515	CDC26, FAM40B, KIAA0828, SMO, TNPO3, TSPAN33	6	TNPO3, TSPAN33, FAM40B	3
11	8q24.13	chr8:125785794-128321986	1.5639e-24	0.814815	3.40813	KIAA0196, MTSS1, NSE2, NSMCE2, SQLE, TRIB1, ZNF572	7	SQLE, KIAA0196, NSE2	3
12	10p13	chr10:11589399-14236412	0.00037399	0.481481	2.6263	C10orf30, C10orf47, C10orf49, C10orf7, CAMK1D, CCDC3, DHTKD1, ECHDC3, FRMD4A, LOC439951, MCM10, NUDT5, OPTN, PHYH, PRPF18, SEC61A2, SEPHS1, UPF2, USP6NL	19	DHTKD1, NUDT5, MCM10	3
13	11p13	chr11:33748842-34102446	0.013023	0.296296	3.06241	FBXO3, GPIAP1, LMO2, NAT10, PRO1787	5	NAT10	1
14	11q13.3	chr11:68782357-69518351	0.012142	0.407407	2.71521	CCND1, FGF19, FGF3, FGF4, MYEOV, ORAOV1	6	CCND1, FGF19, FGF3	3
15	12p13.33	chr12:1-1338333	3.8535e-05	0.5	2.79966	B4GALNT3, CCDC77, ERC1, HSN2, IQSEC3, JARID1A, LOC100049716, NINJ2, RAD52, SLC6A12, SLC6A13, VAPI36682, WNK1	13	B4GALNT3	1
16	13q34	chr13:109832482-114142980	0.027582	0.37037	2.71481	ADPRHL1, ANKRD10, ARHGEF7, ATP11A, ATP4B, C13orf16, C13orf28, C13orf8, CDC16, COL4A2, CUL4A, DCUN1D2, F10, F7, FAM70B, FLJ10769, FLJ12118, FLJ26443, GAS6, GFTG36623, GRK1, GRTP1, ING1, LAMP1, LOC121792, LOC374515, LOC650363, LOC729333, LOC729357, LOC731227, LOC731348, LOC731523, LOC731637, MCF2L, NPLA13441, PCID2, PROZ, RAB20, RASA3, SALG31197, SOX1, TFDP1, TMCO3, TUBGCP3, UPF3A	45	X230982_at, F7, GRTP1, DCUN1D2, TFDP1, FAM70B	6
17	15q26.3	chr15:96852814-97314482	0.14212	0.314815	2.76552	FLJ39743, IGF1R	2
18	17p13.3	chr17:2000814-2022855	0.1073	0.277778	2.94762	SMG6	1
19	17q25.3	chr17:74065397-78599931	0.00031798	0.518519	2.70857	AATK, ACTG1, ALEK31460, ANAPC11, ARHGDIA, ARL16, ASPSCR1, AZI1, B3GNTL1, BAIAP2, C17orf27, C17orf55, C17orf56, C17orf62, C17orf70, C17orf89, C1QTNF1, CANT1, CARD14, CBX2, CBX4, CBX8, CCDC57, CD7, CHMP6, CSNK1D, DCXR, DDX48, DKFZp434D1428, DKFZp761P0212, DNAHL1, DUS1L, DYSFIP1, ELAK30030, ENPP7, FASN, FLJ20753, FLJ21865, FLJ22222, FLJ35220, FLJ35767, FN3K, FN3KRP, FOXK2, FSCN2, GAA, GPHQ31454, GPS…	104	LOC284120, PSCD1, LGALS3BP, CANT1, CBX2, ELAK30030, CBX4, FLJ20753, GAA, DDX48, CARD14, KIAA1618, C17orf27, C17orf55, FSCN2, TSPAN10, MGC16597, HGS, MRPL12, SLC25A10, P4HB, ARHGDIA, THOC4, ANAPC11, SIRT7, MAFG, PYCR1, ASPSCR1, STRA13, LRRC45, RAC3, DCXR, GPS1, DUS1L, FASN, SLC16A3, CD7, SECTM1, C17orf62, PRO0478	40
20	19q13.2	chr19:43481772-44068823	0.049799	0.5	2.51389	ACTN4, C19orf15, C19orf33, CAPN12, ECH1, EIF3S12, FAM98C, FLJ45909, GGN, HNRPL, KCNK6, LGALS4, LGALS7, LOC541469, MAP4K1, PSMD8, RASGRP4, RYR1, SIRT2, SPRED3, YIF1B	21	LOC541469, C19orf33, YIF1B, KCNK6, C19orf15, PSMD8, MAP4K1, ACTN4	8
21	20q13.13	chr20:48242576-48496716	0.021157	0.518519	2.53727	CEBPB, KLLA6061	2	KLLA6061	1
22	22q12.2	chr22:28567770-28928013	0.16322	0.388889	2.57693	HORMAD2, MTMR3, QSQK36724	3
							372		103

## Sheet: Breast_TN_Loss
	Cytoband	Wide Peak Boundary	Q-value	Frequency	Avg. Copy Number	Genes	Total GNE Genes	PADGE	Total PADGE
1	1p36.23	chr1:6589804-8408413	0.0038735	0.518519	1.55055	CAMTA1, DKFZp566H0824, DNAJC11, DNB5, ERRFI1, FTGK36864, LOC727939, PARK7, PER3, PHF13, RERE, THAP3, TNFRSF9, UTS2, VAMP3	15	PHF13, THAP3, DNAJC11, CAMTA1, VAMP3, PER3, UTS2, FTGK36864, TNFRSF9, PARK7, DNB5, DKFZp566H0824	12
2	3p14.1	chr3:64520324-65038422	1.1665e-06	0.685185	1.53018	ADAMTS9, KQGV29114	2	KQGV29114, X234078_at	2
3	4p15.2	chr4:26837084-29012801	3.6694e-07	0.62963	1.4804
4	4q35.1	chr4:178393355-183305738	1.2224e-05	0.611111	1.51924	AGA, LOC285501, LSMC32439, MGC45800, NEIL3	5	NEIL3, AGA, LSMC32439, MGC45800	4
5	5q14.3	chr5:85616833-93308739	8.134e-08	0.685185	1.47621	ARRDC3, C5orf21, CCNH, CETN3, COX7C, DKFZp727I021, EGEG30686, FLJ11292, FLJ25680, GPR98, HSPC101, LOC133789, LOC153364, LOC644285, LYSMD3, MEF2C, NR2F1, POLR3G, RASA1, RP11-483I13.1, RRFR29237, TMEM161B	22	COX7C, FLJ11292, RASA1, LOC644285, CCNH, TMEM161B, X230902_at, MEF2C, CETN3, HSPC101, LOC153364, POLR3G, DKFZp727I021, GPR98, RRFR29237, EGEG30686	16
6	5q34	chr5:160211348-163517721	1.3778e-05	0.648148	1.5526	ATP10B, CCNG1, GABRA1, GABRA6, GABRB2, GABRG2, HMMR, MAT2B, NUDCD2	9	ATP10B, GABRB2, GABRA6, GABRA1, GABRG2, NUDCD2, HMMR, MAT2B	8
7	6q27	chr6:166640395-170899992	0.00014957	0.555556	1.5224	AHVG32563, ALMV29339, BRP44L, C6orf120, C6orf122, C6orf70, CCR6, DACT2, DLL1, FAM120B, FGFR1OP, FRMD1, GPR31, HGC6.1.1, HGC6.2, HGC6.4, KIF25, LOC154323, LOC154449, LOC441178, LOC441179, LOC729427, LOC729439, LOC729744, LOC732174, LOC732420, LOC732431, LOC732438, MGC35308, MLLT4, PDCD2, PHF10, PSMB1, RNASET2, RP1-266L20.1, RPS6KA2, SFT2D1, SMOC2, TBP, TCP10, TCTE3, THBS2, TTLL2, UNC93A, VKIK13366…	46	MGC35308, SFT2D1, ALMV29339, BRP44L, RPS6KA2, RNASET2, FGFR1OP, GPR31, UNC93A, TTLL2, AHVG32563, TCP10, HGC6.2, LOC441179, HGC6.4, MLLT4, X211111_at, HGC6.1.1, KIF25, FRMD1, LOC154323, VKIK13366, X240132_at, THBS2, WDR27, C6orf120, PHF10, X238833_at, C6orf70, RP1.266L20.1, FAM120B, PSMB1, TBP, PDCD2	34
8	8p22	chr8:10309769-17018352	9.9498e-12	0.722222	1.42429	AMAC1L2, BLK, C8orf13, C8orf15, C8orf48, C8orf5, C8orf74, CTSB, DEFB130, DEFB134, DEFB136, DEFB137, DLC1, DUB3, EFHA2, FAM86B1, FDFT1, FGF20, FLJ37098, GATA4, IPLS36597, KIAA1456, LOC157740, LOC377632, LOC440053, LOC442381, LOC646253, LOC649294, LOC649396, LOC729732, LOC731146, LONRF1, MSR1, MSRA, MTMR9, NEIL2, PINX1, RP1L1, SGCZ, SOX7, TCTF36553, TDH, TUSC3, UNQ9391, XKR6	45	MSRA, PINX1, XKR6, C8orf5, C8orf15, LOC157740, MTMR9, TDH, C8orf13, BLK, GATA4, NEIL2, FDFT1, CTSB, LOC440053, DUB3, FAM86B1, TCTF36553, IPLS36597, C8orf48, MSR1, FGF20	22
9	9p21.3	chr9:21822729-22346406	4.5343e-12	0.555556	1.29267	ANRIL, C9orf53, CDKN2A, CDKN2B, MTAP	5	MTAP, C9orf53, CDKN2A, ANRIL, CDKN2B	5
10	10q23.31	chr10:89791068-90313000	1.0245e-07	0.592593	1.43759	C10orf59	1	C10orf59	1
11	11p15.4	chr11:4005782-6154146	0.014893	0.592593	1.60843	C11orf40, GGFG32087, HBE1, LOC119684, LOC196120, LOC390031, LOC390033, LOC441584, LOC643753, MGC20470, MMP26, OR51A1P, OR51A7, OR51B2, OR51B4, OR51B5, OR51B6, OR51D1, OR51E1, OR51F1, OR51F2, OR51G1, OR51G2, OR51I1, OR51I2, OR51J1P, OR51L1, OR51M1, OR51Q1, OR51S1, OR51T1, OR51V1, OR52A1, OR52A4, OR52A5, OR52B2, OR52B4, OR52B6, OR52D1, OR52E2, OR52E4, OR52E6, OR52E8, OR52H1, OR52I1, OR52I2, OR52J3,…	72	STIM1, RRM1, TRIM21, OR52K3P, OR51E1, PSGR, MMP26, X221329_at, OR51A1P, HBE1, OR51B4, OR51B2, OR51B5, OR51B6, OR51M1, OR51J1P, OR51I1, OR51I2, GGFG32087, OR52D1, UBQLN3, MGC20470, X223599_at, TRIM5, TRIM22	25
12	11q25	chr11:130289357-134452384	0.0063245	0.537037	1.54998	ACAD8, B3GAT1, GLB1L3, HNT, IGSF9B, JAM3, LOC283174, LOC729305, LOC729860, LOC729893, LOC729919, LOC89944, NCAPD3, NVVA29690, OPCML, RSQG32139, SNX19, SPATA19, THYN1, VPS26B	20	SNX19, HNT, OPCML, LOC283174, IGSF9B, RSQG32139, NVVA29690, NCAPD3, VPS26B, ACAD8, LOC89944, B3GAT1	12
13	12q21.2	chr12:75995800-82003212	0.011395	0.537037	1.56125	C12orf26, CCDC59, FLJ21963, FLJ90579, ISKQ36534, LIN7A, LOC283308, LOC338756, MYF5, MYF6, NAV3, PAWR, PPFIA2, PPP1R12A, PTPRQ, RPRQ29735, SYT1, TMTC2	18	SYT1, PAWR, RPRQ29735, MYF6, MYF5, LIN7A, FLJ21963, ISKQ36534, PPFIA2, CCDC59, TMTC2	11
14	13q21.1	chr13:54373781-57084441	1.1284e-08	0.62963	1.50604	FLJ40296	1
15	14q31.1	chr14:80032853-80953688	4.454e-05	0.648148	1.53786	C14orf145, GTF2A1, QILT37243, SNORA79, SQLG31227, STON2, TSHR, UNGP3	8	C14orf145, TSHR, SQLG31227, QILT37243, GTF2A1, STON2	6
16	15q21.1	chr15:44208052-45726919	4.7756e-07	0.722222	1.52353
17	17p12	chr17:10050995-12639621	7.5679e-05	0.666667	1.56296	C17orf48, DNAH9, EFTR36701, FLJ45455, GREG6006, KIAA0672, LOC284033, LOC388335, MAP2K4, MYH1, MYH13, MYH2, MYH3, MYH4, MYH8, MYOCD, SCO1, TMET32643, ZNF18	19	MYH13, MYH8, MYH4, MYH1, MYH2, MYH3, SCO1, C17orf48, GREG6006, TMET32643, FLJ45455, LOC284033, DNAH9, ZNF18, MAP2K4, EFTR36701	16
18	18q22.3	chr18:71032531-76117153	8.4363e-05	0.537037	1.50352	AGGL30064, ATP9B, C18orf22, CTDP1, DKFZP434C0826, FLJ37638, GALA31490, GALR1, KCNG2, LOC284274, LOC727759, LOC728864, LOC729180, LOC731060, LOC731294, LOC731304, LOC731311, LOC731450, MBP, NFATC1, ORF1, PARD6G, PAWD30062, PQLC1, SALL3, TSHZ1, TXNL4A, ZADH2, ZNF236, ZNF508, ZNF516	31	ZADH2, TSHZ1, DKFZP434C0826, GALA31490, ZNF236, PAWD30062, GALR1, X230889_at, SALL3, ATP9B, NFATC1, ORF1, LOC731450, CTDP1, KCNG2, AGGL30064, TXNL4A, C18orf22, ZNF508, PARD6G	20
19	22q13.33	chr22:47124906-49691432	0.064609	0.462963	1.57194	ACR, ADM2, ALG12, ARSA, BRD1, C22orf34, CRELD2, ECGF1, Em:U62317.15, FAM116B, FAM19A5, FLJ41993, HDAC10, KLHDC7B, LOC150400, LOC376856, LOC440836, LOC644111, LOC644186, LOC728794, LOC731014, LOC731245, LOC731276, LOC90834, MAPK11, MAPK12, MAPK8IP2, MGC70863, MIOX, MLC1, MOV10L1, NCAPH2, PANX2, PIM3, PLXNB2, RABL2B, RP3-355C18.2, RP3-402G11.5, SAPS2, SBF1, SCO2, SHANK3, SRKK32649, SYN22A2, TMEM153…	48	FAM19A5, SRKK32649, LOC150400, C22orf34, BRD1, LOC90834, ZBED4, ALG12, CRELD2, PIM3, MLC1, MOV10L1, PANX2, TRABD, RP3.402G11.5, TUBGCP6, HDAC10, MAPK12, MAPK11, PLXNB2, FAM116B, SAPS2, SBF1, ADM2, MIOX, TMEM153, NCAPH2, SCO2, ECGF1, LOC440836, SYN22A2, LOC644186, X204193_at, Em.U62317.15, MAPK8IP2, ARSA, ACR, RABL2B	38
20	Xp22.33	chrX:1-854412	2.6112e-83	0.981481	1.098	GTPBP6, LOC652806, LOC652808, LOC652809, PLCXD1, PPP2R3B, SHOX	7	PLCXD1, GTPBP6, PPP2R3B, SHOX	4
21	Xq21.31	chrX:91540191-91712653	1.7553e-52	0.925926	1.19693	PCDH11X	1	PCDH11X	1
							375		237

## Sheet: Breast_HR_Gain
	Cytoband	Wide Peak Boundary	Q-value	Frequency	Avg. Copy Number	Genes	Total GNE Genes	PADGE	Total PADGE
1	1q21.2	chr1:148564177-149065666	4.4571e-11	0.792453	2.90345	ADAMTSL4, ARNT, CTSK, CTSS, ECM1, ENSA, GOLPH3L, HORMAD1, KFLA37129, KIAA0460, MCL1, PRPF3, TARSL1	13	ECM1, ENSA, HORMAD1, CTSS	4
2	3q27.2	chr3:184399910-187277741	0.13168	0.433962	2.39495	ABCC5, ABCF3, ALG3, AP2M1, B3GNT5, C3orf40, C3orf65, CAMK2N2, CHRD, CLCN2, DVL3, EHHADH, EIF2B5, EIF4G1, EPHB3, ETV5, FLJ32438, HTR3C, HTR3D, HTR3E, IGF2BP2, KLHL24, KLHL6, LIPH, LOC285248, LOC285382, LOC375383, LOC90113, MAGEF1, MAP3K13, MAP6D1, MCF2L2, MGC2408, PARL, POLR2H, PSMD2, SENP2, SFRS10, SNORD66, THPO, TMEM41A, TSVR17776, VGGT37170, VPS8, YEATS2	45	KLHL6, VGGT37170, ABCC5, ALG3, MGC2408, PSMD2, EIF4G1, VPS8	8
3	5p13.2	chr5:35291658-36016729	0.027861	0.283019	2.89573	CAPSL, FLJ23577, IL7R, UGT3A1	4	IL7R, CAPSL	2
4	7p22.1	chr7:6037320-8144457	0.00038495	0.396226	2.59665	C1GALT1, C7orf26, C7orf28B, COL28A1, DAGLBETA, DKFZp434J1015, EIF2AK1, FLJ20306, FLJ20323, GLCCI1, GRID2IP, ICA1, KDELR2, LOC155340, LOC401307, LOC730440, MGC12966, PSCD3, QWRD13326, RAC1, RPA3, USP42, VKEK29350, ZDHHC4, ZNF12	25	KDELR2, C7orf28B, RPA3, ICA1	4
5	7q11.23	chr7:71547254-73030804	0.0056072	0.490566	2.48017	ABHD11, BAZ1B, BCL7B, CALN1, CLDN3, CLDN4, FKBP6, FZD9, LOC375587, LOC389517, LOC442578, MLXIPL, NCF1C, NSUN5, NSUN5C, PMS2L8, POM121, SBDSP, STX1A, TBL2, TRIM50, TRIM73, TRIM74, VPS37D, WBSCR18, WBSCR22, WBSCR27, WBSCR28	28	CALN1, PMS2L8, NCF1C, TBL2, WBSCR22, STX1A, ABHD11, CLDN3, CLDN4	9
6	8p12	chr8:37656115-38105359	4.3232e-19	0.45283	5.26725	ADRB3, ASH2L, BRF2, EIF4EBP1, GOT1L1, GPR124, LOC220857, PROSC, RAB11FIP1, SPFH2, ZNF703	11	ZNF703, RAB11FIP1, EIF4EBP1	3
7	8q22.1	chr8:94094023-98010802	7.5267e-08	0.509434	3.09854	C8orf37, C8orf38, CCNE2, CDH17, DPY19L4, FAM92A1, FSBP, GDF6, GEM, INTS8, KIAA1429, LOC375675, LOC730653, MTERFD1, PGCP, PLEKHF2, PPM2C, PTDSS1, RAD54B, RBM12B, RBM35A, SDC2, TMEM67, TP53INP1, UQCRB	25	X244014_x_at, CDH17, KIAA1429, RBM35A, INTS8, CCNE2, TP53INP1, C8orf38, PLEKHF2, MTERFD1, PTDSS1	11
8	10q22.2	chr10:76194937-76828064	0.097752	0.320755	2.59387	COMTD1, DUPD1, DUSP13, LOC374337, MYST4, SAMD8, SPA17P1, VDAC2, ZNF503	9	COMTD1, LOC374337	2
9	11q13.2	chr11:68913062-69302621	1.346e-16	0.509434	4.07887	CCND1, FGF19, FGF4, ORAOV1	4	CCND1, FGF19	2
10	11q14.1	chr11:77771344-78005965	1.7396e-06	0.245283	4.64215	GAB2, LOC732119, NARS2	3
11	12q15	chr12:67519605-68281533	0.00054433	0.433962	2.81534	CCT2, CPM, CPSF6, FATS37098, FRS2, LYZ, MDM2, MGC5370, SFSK37285, YEATS4	10	MGC5370, FATS37098, LYZ	3
12	14q13.2	chr12:67519605-68281533	0.052847	0.415094	2.50366	BAZ1A, C14orf10, C14orf24, CFL2, GARNL1, INSM2, KIAA0391, NFKBIA, PSMA6, SRP54	10	BAZ1A, PSMA6	2
13	16p11.2	chr16:30531734-31351286	7.5267e-08	0.716981	2.76585	BCKDK, BCL7C, COX6A2, CTF1, FBS1, FBXL19, FUS, HSD3B7, ITGAD, ITGAM, ITGAX, KIAA0326, LOC730183, LOC90835, LPQY29927, MYST1, PHKG2, POL3S, PRR14, PRSS36, PRSS8, PYCARD, PYDC1, QVSV36993, RNF40, SETD1A, SNORA30, SRCAP, STX1B1, STX4, TMEM142C, TRIM72, VKORC1, ZNF646, ZNF668	35	SRCAP, PHKG2, LOC90835, RNF40, FBXL19, HSD3B7, PRSS8, PYCARD, PYDC1, ITGAX	10
14	17p13.3	chr17:2000814-2022855	0.04709	0.320755	2.74996	SMG6	1
15	17q23.1	chr17:55179326-55561017	7.0809e-09	0.45283	3.47234	ABC1, AP1S2, LOC51136, RPS6KB1, TMEM49, TUBD1, Zdsc1	7	TMEM49, ABC1, Zdsc1	3
16	18q11.2	chr18:19728234-20331415	0.2151	0.226415	2.86005	C18orf17, CABYR, HRH4, IMPACT, LAMA3, OSBPL1A	6	C18orf17, HRH4	2
17	19p13.11	chr19:18292676-19473030	0.027861	0.45283	2.48253	C19orf4, C19orf50, COMP, COPE, CRLF1, CRTC1, CSPG3, DDX49, ELL, FAAR31517, FKBP8, FLJ20850, GATAD2A, GDF15, HOMER3, ISYNA1, KIAA0892, KLHL26, LASS1, LRRC25, LSM4, MEF2B, MGC10814, MGC19595, MGC26694, PGPEP1, RFXANK, SF4, SFRS14, SSBP4, TM6SF2, TMEM161A, TRA16, UBA52, UPF1	35	LSM4, GDF15, ISYNA1, COMP, MGC10814, COPE, HOMER3	7
18	19q13.33	chr19:55567210-55877806	0.010693	0.471698	2.5685	JOSD2, LOC112703, LOC284361, LOC342918, LOC554235, LRRC4B, MYBPC2, NIFT31548, NR1H2, POLD1, QGPP13438, SHANK1, SPIB, SYT3	14	POLD1, SPIB, LOC284361, NIFT31548, LOC554235, SYT3	6
19	20q11.22	chr20:33538280-34577611	2.8057e-06	0.584906	2.68806	C20orf152, C20orf173, C20orf4, C20orf52, CEP250, DLGAP4, EPB41L1, ERGIC3, FER1L4, LOC343705, LOC375095, LOC647979, NFS1, PHF20, RBM12, RBM39, SCAND1, SPAG4	18	CEP250, FER1L4, LOC375095, SPAG4, SCAND1	5
20	20q13.2	chr20:51611474-52306282	5.8898e-09	0.490566	3.24432	BCAS1, CYP24A1, PFDN4, RP4-724E16.2, ZNF217	5	ZNF217, BCAS1	2
							308		85

## Sheet: Breast_HR_Loss
	Cytoband	Wide Peak Boundary	Q-value	Frequency	Avg. Copy Number	Genes	Total GNE Genes	PADGE	Total PADGE
1	1p21.3	chr1:95265369-98795143	0.016931	0.584906	1.64257	ALG14, DPYD, FLJ35409, LFPA31762, LOC284555, LOC730768, LOC730785, PTBP2, RWDD3, TMEM56	10	TMEM56, RWDD3, LOC284555, PTBP2	4
2	6p25.3	chr6:1435872-1510377	0.0071351	0.471698	1.56423
3	6q16.1	chr6:93845840-96269387	4.0093e-09	0.679245	1.49192	EPHA7, MANEA	2	EPHA7, MANEA	2
4	8p22	chr8:17302776-19021932	5.5017e-13	0.679245	1.40246	ASAH1, FGL1, MTMR7, MTUS1, NAT1, NAT2, PCM1, PDGFRL, PSD3, PVIP36668, SLC7A2	11	MTMR7, FGL1, PCM1, PVIP36668, ASAH1, NAT1, NAT2, PSD3	8
5	9p21.3	chr9:21780833-23122132	1.1576e-06	0.509434	1.47324	ANRIL, C9orf53, CDKN2A, CDKN2B, DMRTA1, MTAP	6	MTAP, C9orf53, CDKN2A, ANRIL, CDKN2B, DMRTA1	6
6	10q26.2	chr10:130019951-133005594	0.0019211	0.471698	1.52703	EBF3, LOC374362, LOC387723, LOC643495, LOC643624, LOC728455, MGMT, QGVO12443, STGN29599, TCERG1L, TXNL2	11	LOC374362, MGMT, STGN29599, LOC643495, EBF3, LOC387723, TXNL2, TCERG1L	8
7	11q12.1	chr11:59099652-59899165	0.067524	0.358491	1.51158	FLJ36874, GIF, LOC255649, MRPL16, MS4A2, MS4A3, MS4A4A, MS4A4E, MS4A6A, MS4A6E, OR10V1, OSBP, STX3, TCN1, TMEM122	15	OSBP, FLJ36874, STX3, MRPL16, GIF, TCN1, MS4A3, MS4A2, MS4A6A, MS4A6E	10
8	11q22.3	chr11:102540721-106596900	7.5065e-13	0.698113	1.4159	AASDHPPT, CASP4, CASP5, DDI1, DNCH2, GRIA4, GUCY1A2, ICEBERG, KBTBD3, KIAA1826, PDGFD, SAVR28825	12	DDI1, CASP4, CASP5, X211366_x_at, ICEBERG, GRIA4, KIAA1826, KBTBD3, AASDHPPT, GUCY1A2	10
9	13q21.33	chr13:67124138-70445147	1.6799e-05	0.603774	1.52772	KLHL1	1	KLHL1	1
10	14q24.3	chr14:77903304-81829947	0.00062776	0.528302	1.55047	C14orf145, DIO2, GTF2A1, LOC374557, LOC374558, LOC730093, NRXN3, QILT37243, SEL1L, SNORA79, SQLG31227, STON2, TSHR, UNGP3	14	NRXN3, DIO2, C14orf145, TSHR, SQLG31227, QILT37243, GTF2A1, STON2, SEL1L	9
11	15q14	chr15:33480040-37890332	0.1452	0.415094	1.59253	ATPBD4, C15orf41, FAM98B, FLJ35695, FLJ39531, FSIP1, GPR176, IEFR36938, KRPF32640, LOC145845, MEIS2, RASGRP1, RFNC32212, SPRED1, THBS1, TMCO5	16	ATPBD4, C15orf41, LOC145845, RFNC32212, IEFR36938, RASGRP1, KRPF32640, THBS1, FSIP1, GPR176	10
12	16q21	chr16:61107734-64716701	1.4043e-09	0.641509	1.44633	CDH11, FILS31352	2	CDH11, FILS31352	2
13	17p12	chr17:11743275-12389643	8.6325e-13	0.603774	1.3644	DNAH9, MAP2K4, ZNF18	3	DNAH9, ZNF18, MAP2K4	3
14	18q22.1	chr18:61400118-72094177	0.0023345	0.471698	1.54785	AGPR30059, C18orf4, C18orf51, C18orf55, CBLN2, CCDC102B, CD226, CDH19, CDH7, CNDP1, CNDP2, CYB5A, DKFZP434C0826, DKFZp781G0119, DOK6, FBXO15, GNDL12522, GTSCR1, LOC284274, LOC400657, LOC728354, NETO1, RQIP30058, RTTN, SOCS6, TSHZ1, TXNDC10, ZADH2, ZNF407	29	CDH7, CDH19, RQIP30058, TXNDC10, CCDC102B, DOK6, CD226, RTTN, SOCS6, CBLN2, NETO1, AGPR30059, FBXO15, C18orf55, CYB5A, C18orf51, GNDL12522, CNDP2, CNDP1, LOC400657, ZNF407, ZADH2, TSHZ1, DKFZP434C0826	24
15	21q11.2	chr21:14480153-16236145	0.00062776	0.45283	1.48051	ABCC13, C21orf116, LIPI, LOC375110, LOC731811, NRIP1, RBM11, SAMSN1, STCH, SYFS31621, USP25	11	LIPI, RBM11, ABCC13, STCH, SAMSN1, NRIP1, C21orf116, USP25	8
16	22q13.31	chr22:45616628-49055522	5.9826e-06	0.584906	1.51907	ALG12, BRD1, C22orf34, CRELD2, FAM19A5, FLJ41993, HDAC10, LOC150400, LOC376856, LOC642757, LOC644111, LOC728794, LOC730841, LOC731014, LOC731245, LOC90834, MAPK11, MAPK12, MLC1, MOV10L1, PANX2, PIM3, RP3-355C18.2, RP3-402G11.5, SRKK32649, TBC1D22A, TRABD, TUBGCP6, ZBED4	29	TBC1D22A, LOC730841, FAM19A5, SRKK32649, LOC150400, C22orf34, BRD1, LOC90834, ZBED4, ALG12, CRELD2, PIM3, MLC1, MOV10L1, PANX2, TRABD, RP3.402G11.5, TUBGCP6, HDAC10, MAPK12, MAPK11	21
17	Xp22.33	chrX:1-854412	4.8557e-114	1	1.05393	GTPBP6, LOC652806, LOC652808, LOC652809, PLCXD1, PPP2R3B, SHOX	7	PLCXD1, GTPBP6, PPP2R3B, SHOX	4
18	Xq21.31	chrX:91640774-91712653	1.3621e-64	1	1.21637	PCDH11X	1	PCDH11X	1
							180		131

## Sheet: Ovary_Gain
	Cytoband	Wide Peak Boundary	Q-value	Frequency	Avg. Copy Number	Genes	Total GNE Genes	PADGE	Total PADGE
1	1p34.2	chr1:43521093-43736229	7.419e-05	0.764706	2.57268	C1orf210, CDC20, ELOVL1, HYI, MED8, MPL, TIE1	7	CDC20, ELOVL1	2
2	1q21.3	chr1:149479106-149907656	1.7334e-08	0.862745	2.63712	CGN, LOC730795, PIK4CB, PIP5K1A, POGZ, PSMB4, PSMD4, RFX5, RP11-126K1.2-001, SELENBP1, SNX27, TUFT1, ZNF687	13	PSMD4, RFX5, SELENBP1, PSMB4, CGN, TUFT1	6
3	1q42.3	chr1:232863415-234598105	6.2571e-07	0.705882	2.7246	ARID4B, B3GALNT2, ERO1LB, GGPS1, GNG4, GPR137B, LOC284527, LOC645645, LYST, NID1, RBM34, SNORA14B, TBCE, TOMM20	14	TBCE	1
4	2p21	chr2:42868052-43629846	0.00060843	0.607843	2.6084	HAAO, KGEO12742, THADA, ZFP36L2	4
5	2q35	chr2:218874332-219511127	0.029389	0.509804	2.47953	BCS1L, CTDSP1, CYP27A1, MGC50811, PLCD4, PNKD, PRKAG3, RNF25, RQCD1, SLC11A1, STK36, TTLL4, USP37, VIL1, WNT10A, WNT6, ZNF142	17	VIL1, STK36, WNT10A	3
6	3p21.31	chr3:47491781-48286182	0.059607	0.519608	2.4769	CAMP, CDC25A, CSPG5, DHX30, MAP4, SCAP, SMARCC1, TMEM103, ZNF589	9	CSPG5	1
7	3q27.1	chr3:184299288-185235540	7.688e-13	0.803922	2.87725	ABCC5, B3GNT5, FLJ32438, HTR3D, KLHL24, KLHL6, LAMP3, MAP6D1, MCCC1, MCF2L2, PARL, VGGT37170, YEATS2	13	LAMP3, FLJ32438, KLHL6, VGGT37170	4
8	5p15.1	chr5:16814579-17300363	0.00075575	0.588235	2.64471	BASP1, FLJ34047, MYO10	3	MYO10	1
9	6p22.3	chr6:17692575-18344747	2.1278e-05	0.745098	2.60703	AOF1, DEK, FAM8A1, KIF13A, NHLRC1, NUP153, TPMT	7	AOF1, DEK	2
10	7q11.23	chr7:73328202-76688631	0.00019084	0.666667	2.55166	4933411G11, CCL24, CCL26, CETE29372, CYLN2, DKFZP434A0131, DTX2, FGL2, FLJ37078, GATS, GTF2I, GTF2IP1, GTF2IRD1, GTF2IRD2, GTF2IRD2B, HIP1, HSPB1, ISAH21588, ITLQ30808, KIAA1505, LOC202802, LOC340318, LOC389517, LOC441259, LOC442582, LOC442590, LOC554248, LOC729393, LOC729414, MDH2, NCF1, NSUN5B, PMS2L11, PMS2L3, PMS2L5, POMZP3, POR, RHBDD2, SNORA14A, SRCRB4D, STYXL1, TMPIT, TRIM73, UPK3B, WBSCR1…	48	GTF2IRD1, GTF2IRD2, PMS2L5, X204961_s_at, LOC441259, NSUN5B, PMS2L3, HIP1, RHBDD2, POR, STYXL1, MDH2, HSPB1, YWHAG, KIAA1505	15
11	7q32.2	chr7:129137469-129682667	1.3819e-07	0.803922	2.66777	C7orf45, FLJ14803, FTDC37120, KIAA0265, LGVK37010, NRF1, UBE2H, ZC3HC1	8	UBE2H, FTDC37120, LGVK37010, KIAA0265, FLJ14803	5
12	8q24.21	chr8:128989030-129988069	9.1623e-23	0.784314	3.50455	PVT1	1
13	9p24.2	chr9:4383876-4819747	0.085634	0.333333	2.78213	AK3L1, C9orf68, CDC37L1, PPAPDC2, RCL1, SLC1A1	6	SLC1A1, PPAPDC2	2
14	10p13	chr10:11983804-12605809	0.019287	0.666667	2.43133	C10orf7, CAMK1D, DHTKD1, NUDT5, SEC61A2, UPF2	6	NUDT5, CAMK1D	2
15	10q22.2	chr10:74692637-76661124	0.00079939	0.588235	2.58649	ADK, ANXA7, AP3M1, C10orf55, CAMK2G, CHCHD1, DUPD1, DUSP13, FUT11, ILTE36956, KIAA0913, LOC653468, MYOZ1, MYST4, NDST2, NTQL29572, PGGD29571, PLAU, PPP3CB, SAMD8, SEC24C, SKIW37337, SYNPO2L, TTC18, USP54, VCL, VDAC2, ZMYND17	28	USP54, MYOZ1, SYNPO2L, FUT11, CHCHD1, SKIW37337, PLAU, AP3M1, ADK	9
16	11q13.1	chr11:66667361-67658534	0.0042566	0.745098	2.44251	ACY3, ADRBK1, AIP, ALDH3B1, ALDH3B2, ANKRD13D, C11orf72, CABP2, CABP4, CDK2AP2, CHKA, CLCF1, FBXL11, GPR152, GSTP1, KIAA1394, LOC645015, LOC645332, LOC729196, LOC731494, LOC731511, LOC731522, NDUFS8, NDUFV1, NUDT8, PITPNM1, POLD4, PPP1CA, PRO1880, RAD9A, RPS6KB2, SSH3, TBC1D10C, TBX10, TCIRG1, TMEM134, UNC93B1	37	POLD4, PPP1CA, TBC1D10C, KIAA1394, RPS6KB2, PITPNM1, CDK2AP2, GSTP1, ALDH3B2, UNC93B1, TCIRG1	11
17	12p13.31	chr12:6246244-6909097	3.6734e-05	0.745098	2.61048	ACRBP, ATN1, C12orf53, CD4, CDCA3, CHD4, COPS7A, ENO2, GAPDH, GNB3, GPR92, HOM-TES-103, ING4, LAG3, LRRC23, LTBR, MLF2, MRPL51, NCAPD2, NOL1, PLEKHG6, PTMS, SCARNA11, SCNN1A, SPSB2, TAPBPL, TNFRSF1A, TNFRSF7, TPI1, USP5, VAMP1, ZNF384	32	SCNN1A, TNFRSF7, TAPBPL, MRPL51, NCAPD2, GAPDH, NOL1, C12orf53, MLF2, CD4, CDCA3, TPI1, SPSB2, ENO2	14
18	14q32.32	chr14:98637383-103089055	0.080405	0.372549	2.43901	AMN, ANKRD9, ARGL37237, BCL11B, C14orf131, C14orf172, C14orf65, C14orf68, C14orf72, C14orf73, CCNK, CDC42BPB, CINP, CKB, CYP46A1, DEGS2, DIO3, DIO3OS, DLK1, DYNC1H1, EIF5, EML1, EVL, FGTW37086, FLSF36670, GMGL32679, HSP90AA1, KIAA0329, KIAA1446, KIAA1822, LOC122423, LOC731680, LOC731724, LOC732161, MARK3, MEG3, PPP2R5C, RAGE, RCOR1, RTL1, SETD3, SLC25A29, SNORA28, SNORD112, SNORD113-1, SNORD113-2…	90	BCL11B, C14orf65, EML1, DEGS2, YY1, SLC25A29, WARS, WDR25, RCOR1, TRAF3, TNFAIP2, CKB	12
19	16p11.2	chr16:29965219-31292484	0.066905	0.607843	2.43119	ALDOA, BCKDK, BCL7C, CD2BP2, CORO1A, CTF1, FBS1, FBXL19, FUS, GDPD3, HSD3B7, ITGAL, ITGAM, ITGAX, KIAA0326, LEQV29925, LOC730183, LOC90835, LPQY29927, MAPK3, MYLPF, MYST1, PHKG2, POL3S, PPP4C, PRR14, PRSS36, PRSS8, PYCARD, PYDC1, QSSP29924, QVSV36993, RNF40, SEPHS2, SETD1A, SEPT1, SNORA30, SRCAP, STX1B1, STX4, SULT1A3, TBC1D10B, TBX6, TMEM142C, TRIM72, VKORC1, XTP3TPA, YPEL3, ZNF553, ZNF646, ZNF6…	58	ALDOA, PPP4C, CORO1A, QSSP29924, MYLPF, XTP3TPA, SEPHS2, SRCAP, PHKG2, HSD3B7, PRSS8, PYCARD, ITGAM, ITGAX	14
20	17q25.3	chr17:73113039-73695277	0.046536	0.509804	2.52027	AFMID, FLJ45079, GLPG464, PFEY37025, SYNGR2, TK1, TMC6, TMC8, TNRC6C	9	TMC6, TMC8, SYNGR2, TK1	4
21	19p13.12	chr19:14180710-14583052	0.00012221	0.745098	2.56325	CD97, DDX39, DNAJB1, EMR3, FLJ45910, GIPC1, GPSN2, NDUFB7, PKN1, PTGER1	10	CD97, DDX39, PKN1, GIPC1, GPSN2, NDUFB7	6
22	19q12	chr19:34670523-35146603	4.7181e-05	0.529412	2.84935	C19orf12, C19orf2, CCNE1, LOC727974, LOC731332, LRRP31524, PLEKHF1, POP4, VSTM2B	9	PLEKHF1, CCNE1	2
23	19q13.2	chr19:44117266-44314689	8.32e-06	0.568627	2.8257	FBXO17, FBXO27, FLJ16165, PAK4	4
24	20q11.22	chr20:32967540-33957246	1.7528e-05	0.823529	2.54807	ACSS2, C20orf173, C20orf44, C20orf52, CEP250, EDEM2, ERGIC3, FAM83C, FER1L4, GDF5, GSS, ITGB4BP, LOC343705, LOC375095, MMP24, MYH7B, NFS1, PHF20, PROCR, RBM12, RBM39, SPAG4, TRPC4AP	23	GSS, EDEM2, ITGB4BP, FER1L4, SPAG4, RBM12, C20orf52	7
25	20q13.2	chr20:49098536-50254946	8.0941e-05	0.764706	2.56115	ATP9A, KWQE37432, NFATC2, SALL4, ZFP64	5	KWQE37432, SALL4, ZFP64	3
26	22q12.2	chr22:29338660-30665280	0.052857	0.333333	2.77283	AGTRL2, C22orf24, C22orf27, C22orf30, DEPDC5, DRG1, DUSP18, EIF4ENIF1, Em:AC005003.4, LIMK2, MORC2, OSBP2, PIB5PA, PIK3IP1, PISD, PLA2G3, RNF185, SELM, SFI1, SLC35E4, SMTN, TCN2, TUG1, VTAK22535, ZNF278	25	PIB5PA, PLA2G3, LIMK2, PISD	4
							486		130

## Sheet: Ovary Loss
	Cytoband	Wide Peak Boundary	Q-value	Frequency	Avg. Copy Number	Genes	Total GNE Genes	PADGE	Total PADGE
1	1p35.3	chr1:29639306-30665771	0.11336	0.392157	1.42472	LOC376587, LOC731929	2
2	4q24	chr4:102870006-106613120	5.183e-08	0.843137	1.49853	BANK1, BDH2, CENPE, CXXC4, KIAA1546, LOC133308, LOC150159, MANBA, NFKB1, PPA2, SLC39A8, TACR3, UBE2D3, YYNG16564, ZCD2	15	BANK1, SLC39A8, NFKB1, MANBA, UBE2D3, ZCD2, LOC133308, CENPE, TACR3, CXXC4, KIAA1546, YYNG16564, PPA2	13
3	4q34.3	chr4:177254672-183001118	1.2615e-09	0.784314	1.39692	AGA, ASB5, LOC285501, NEIL3, SPATA4, SPCS3, VEGFC, WDR17	8	SPATA4, ASB5, SPCS3, VEGFC, NEIL3, AGA	6
4	5q14.2	chr5:82033131-82590104	3.9743e-09	0.764706	1.38961	LOC731042, SCARNA18, TMEM167, XRCC4	4	TMEM167, XRCC4	2
5	6p25.3	chr6:1435872-1510377	0.025831	0.588235	1.5596
6	6q24.2	chr6:145204038-147781141	1.4132e-06	0.784314	1.48922	C6orf103, EPM2A, FBXO30, GRM1, RAB32, SHPRH, STXBP5, UTRN	8	GRM1, RAB32, C6orf103, STXBP5	4
7	7p21.3	chr7:6646287-8712043	0.066361	0.490196	1.49622	C1GALT1, C7orf28B, COL28A1, DKFZp434J1015, FLJ20323, GLCCI1, ICA1, LOC155340, LOC401307, LOC730440, NXPH1, QWRD13326, RPA3, VKEK29350, ZNF12	15	ZNF12, C7orf28B, C1GALT1, COL28A1, QWRD13326, FLJ20323, RPA3, LOC401307, GLCCI1, ICA1, NXPH1	11
8	8p22	chr8:10309769-17018352	7.2763e-12	0.764706	1.29823	AMAC1L2, BLK, C8orf13, C8orf15, C8orf48, C8orf5, C8orf74, CTSB, DEFB130, DEFB134, DEFB136, DEFB137, DLC1, DUB3, EFHA2, FAM86B1, FDFT1, FGF20, FLJ37098, GATA4, IPLS36597, KIAA1456, LOC157740, LOC377632, LOC440053, LOC442381, LOC646253, LOC649294, LOC649396, LOC729732, LOC731146, LONRF1, MSR1, MSRA, MTMR9, NEIL2, PINX1, RP1L1, SGCZ, SOX7, TCTF36553, TDH, TUSC3, UNQ9391, XKR6	45	MSRA, SOX7, PINX1, XKR6, C8orf5, C8orf15, LOC157740, MTMR9, TDH, C8orf13, BLK, NEIL2, FDFT1, CTSB, LOC440053, DUB3, FAM86B1, TCTF36553, KIAA1456, C8orf48, MSR1, FGF20	22
9	9p21.3	chr9:22292224-22808495	0.0035417	0.45098	1.34963	DMRTA1	1	DMRTA1	1
10	10q23.31	chr10:89719423-90081575	4.8578e-07	0.54902	1.27602	C10orf59, PTEN	2	PTEN, C10orf59	2
11	11p15.4	chr11:7465966-7741547	4.2895e-05	0.705882	1.477	CYB5R2, GGPG31043, OLFML1, OVCH2, PPFIBP2	5	GGPG31043, PPFIBP2, CYB5R2	3
12	11q25	chr11:130355421-134452384	0.21099	0.490196	1.50512	ACAD8, B3GAT1, GLB1L3, HNT, IGSF9B, JAM3, LOC283174, LOC729305, LOC729860, LOC729893, LOC729919, LOC89944, NCAPD3, NVVA29690, OPCML, RSQG32139, SPATA19, THYN1, VPS26B	19	HNT, OPCML, LOC283174, IGSF9B, RSQG32139, NVVA29690, NCAPD3, VPS26B, ACAD8, LOC89944, B3GAT1	11
13	12q21.32	chr12:85609059-88019972	0.0055833	0.529412	1.46989	C12orf29, C12orf50, CEP290, KITLG, MGAT4C, RRCS31143, TMTC3	7	MGAT4C, C12orf50, C12orf29, CEP290, TMTC3	5
14	13q21.1	chr13:53840962-56946037	0.0020722	0.588235	1.49492	FLJ40296, RP11-365K22.1-001	2
15	14q23.3	chr14:66216511-66963682	0.00017402	0.470588	1.41301	ATP6V1D, C14orf54, EIF2S1, GPHN, MPP5, PLEK2	6	GPHN, MPP5, ATP6V1D, EIF2S1, PLEK2	5
16	15q14	chr15:37288274-37890332	0.0087016	0.647059	1.56406	FLJ39531, FSIP1, GPR176, THBS1	4	THBS1, FSIP1, GPR176	3
17	16q23.3	chr16:80706086-82184167	1.6854e-06	0.764706	1.47617	CDH13, MPHOSPH6	2	MPHOSPH6, CDH13	2
18	17p13.3	chr17:2022857-2164416	0.063427	0.529412	1.54752	LOC440396, SMG6, SRR	3	SMG6, SRR	2
19	17q12	chr17:28404610-29200208	1.4132e-06	0.745098	1.46637	ACCN1	1	ACCN1	1
20	18q22.1	chr18:63847445-68141598	5.147e-11	0.843137	1.41398	CCDC102B, CD226, DOK6, GTSCR1, RTTN, SOCS6, TXNDC10	7	TXNDC10, CCDC102B, DOK6, CD226, RTTN, SOCS6	6
21	19p13.3	chr19:1-4004089	0.015313	0.588235	1.56462	ABCA7, ADAMTSL5, AES, AMH, AP3D1, APBA3, APC2, ARID3A, ATCAY, ATP5D, ATP8B3, AVDE37019, AZU1, BRUNOL5, BSG, BTBD2, C19orf19, C19orf20, C19orf21, C19orf22, C19orf23, C19orf24, C19orf25, C19orf26, C19orf28, C19orf29, C19orf34, C19orf35, C19orf36, C19orf6, CDC34, CFD, CIRBP, CNN2, CSNK1G2, DAPK3, DAZAP1, DIRAS1, DOHH, DOT1L, EDG6, EEF2, EFNA2, ELA2, FAM108A1, FGF22, FLJ11535, FSTL3, FZR1, GADD45B, G…	139	PPAP2C, MIER2, THEG, KIAA1957, C19orf19, MADCAM1, C19orf20, BSG, CDC34, GZMM, HCN2, POLRMT, RNF126, FSTL3, C19orf21, PTBP1, FLJ11535, AZU1, PRTN3, ELA2, THRAP5, C19orf22, KISS1R, ARID3A, LXVE8543, WDR18, GRIN3B, C19orf6, ABCA7, HMHA1, POLR2E, GPX4, KIAA0963, STK11, C19orf26, ATP5D, MIDN, C19orf23, C19orf24, EFNA2, NDUFS7, DAZAP1, APC2, C19orf25, PCSK4, ADAMTSL5, RKHD1, SQPQ32310, MBD3, UQCR, TCF3…	111
22	21q21.3	chr21:29727601-30119623	0.073285	0.529412	1.50708	GRIK1	1	X234938_at, GRIK1	2
23	22q13.32	chr22:46912656-49055522	1.125e-11	0.745098	1.34993	ALG12, BRD1, C22orf34, CRELD2, FAM19A5, FLJ41993, HDAC10, LOC150400, LOC376856, LOC644111, LOC728794, LOC731014, LOC731245, LOC90834, MAPK11, MAPK12, MLC1, MOV10L1, PANX2, PIM3, RP3-355C18.2, RP3-402G11.5, SRKK32649, TRABD, TUBGCP6, ZBED4	26	SRKK32649, LOC150400, C22orf34, LOC90834, ZBED4, ALG12, CRELD2, PIM3, MLC1, MOV10L1, PANX2, TRABD, RP3.402G11.5, TUBGCP6, HDAC10, MAPK11	16
24	Xp22.33	chrX:1-854412	5.9015e-41	0.980392	1.07828	GTPBP6, LOC652806, LOC652808, LOC652809, PLCXD1, PPP2R3B, SHOX	7	PLCXD1, GTPBP6, PPP2R3B, SHOX	4
25	Xq21.31	chrX:91666288-91712653	5.351e-42	1	1.07286	PCDH11X	1	PCDH11X	1
							330		233

[truncated: 6 more sheets: Melanoma_Gain, Melanoma Loss, NSCLC_Lung_Gain, NSCLC_Lung_loss, Prostate Gain, Prostate Loss]
