# Supplementary material for: Comparative Oncogenomics Identifies PSMB4 and SHMT2 as Potential Cancer Driver Genes
Source: Oxford University Press journal article supplement (doi:10.1158/0008-5472.can-13-2683), 2014-04-23
Supplement: 00085472can132683-sup-tab6.xlsx [file 00085472can132683-sup-tab6.xlsx]

## Sheet: Gene expression cancer v normal
Table S6a
	Tissue	PSMB4								PSMB5								PSMB6								PSMB7
		RNAseq_CGP		RNAseq_TCGA		Agilent_TCGA		Genelogic		RNAseq_CGP		RNAseq_TCGA		Agilent_TCGA		Genelogic		RNAseq_CGP		RNAseq_TCGA		Agilent_TCGA		Genelogic		RNAseq_CGP		RNAseq_TCGA		Agilent_TCGA		Genelogic
		fc	pV	fc	pV	fc	pV	fc	pV	fc	pV	fc	pV	fc	pV	fc	pV	fc	pV	fc	pV	fc	pV	fc	pV	fc	pV	fc	pV	fc	pV	fc	pV
	Adrenal	--	--	--	--	--	--	1.486	0.0726773	--	--	--	--	--	--	1.44695	<0.001	--	--	--	--	--	--	0.977928	0.874875	--	--	--	--	--	--	0.884781	0.712787
	Blood	--	--	--	--	--	--	0.66136	<0.001	--	--	--	--	--	--	0.741971	0.00837622	--	--	--	--	--	--	0.944083	0.424612	--	--	--	--	--	--	1.84679	<0.001
	Bone	--	--	--	--	--	--	1.19593	0.147123	--	--	--	--	--	--	1.78038	<0.001	--	--	--	--	--	--	1.42224	<0.001	--	--	--	--	--	--	1.04315	0.950593
	Bone Marrow	--	--	--	--	--	--	1.08234	0.833156	--	--	--	--	--	--	0.644722	0.0534814	--	--	--	--	--	--	0.935638	0.752015	--	--	--	--	--	--	1.10198	0.888314
	Brain	--	--	--	--	0.968171	0.683841	1.7497	<0.001	--	--	--	--	0.743572	0.0158393	1.06907	0.199056	--	--	--	--	0.889773	0.154333	1.11657	0.0341799	--	--	--	--	0.910041	0.424774	1.60637	<0.001
	Breast	--	--	1.67792	<0.001	1.5453	<0.001	1.38552	<0.001	--	--	1.5497	<0.001	1.22243	<0.001	1.42936	<0.001	--	--	1.20922	<0.001	1.0351	0.392325	1.0976	0.112756	--	--	1.2313	<0.001	1.1038	0.113965	1.01503	0.88582
	Cervix	--	--	--	--	--	--	1.40539	0.0154511	--	--	--	--	--	--	1.52553	<0.001	--	--	--	--	--	--	1.63612	<0.001	--	--	--	--	--	--	2.10203	<0.001
	Colon	1.31047	<0.001	--	--	1.05225	0.326936	--	--	1.36704	<0.001	--	--	1.04426	0.460823	--	--	0.971426	0.598052	--	--	0.837077	0.00529197	--	--	1.4497	<0.001	--	--	0.972653	0.64924	--	--
	Colorectal	--	--	--	--	--	--	1.35226	<0.001	--	--	--	--	--	--	1.38156	<0.001	--	--	--	--	--	--	1.0644	0.0420851	--	--	--	--	--	--	1.15397	<0.001
	Endometrium	--	--	--	--	--	--	1.32074	0.0905842	--	--	--	--	--	--	1.42101	<0.001	--	--	--	--	--	--	1.08607	0.362787	--	--	--	--	--	--	1.03381	0.831638
	Esophagus	--	--	--	--	--	--	1.27023	0.0675991	--	--	--	--	--	--	1.10138	0.172814	--	--	--	--	--	--	0.937795	0.514786	--	--	--	--	--	--	1.41595	0.0675991
	Head and Neck	--	--	--	--	--	--	1.77649	0.0119518	--	--	--	--	--	--	1.63122	0.0295502	--	--	--	--	--	--	1.43486	0.0295502	--	--	--	--	--	--	1.17934	0.235225
	Head_Neck	--	--	1.55679	<0.001	--	--	--	--	--	--	1.38217	<0.001	--	--	--	--	--	--	1.12215	0.0150608	--	--	--	--	--	--	1.4877	<0.001	--	--	--	--
	Heart	--	--	--	--	--	--	0.820998	0.533333	--	--	--	--	--	--	1.30214	0.0888889	--	--	--	--	--	--	1.04138	0.844444	--	--	--	--	--	--	1.33284	0.177778
	Kidney	--	--	1.10074	0.00155415	--	--	1.0753	0.244435	--	--	0.810217	<0.001	--	--	0.94017	0.0477227	--	--	0.849779	<0.001	--	--	0.940824	0.0789881	--	--	1.2092	<0.001	--	--	1.0391	0.429954
	Liver	--	--	2.17786	<0.001	--	--	1.46223	<0.001	--	--	2.10107	<0.001	--	--	1.29059	0.00891284	--	--	1.30556	0.0290455	--	--	1.00866	0.91101	--	--	1.47085	0.00285673	--	--	0.727345	0.0112601
	Lung	1.44042	<0.001	1.99417	<0.001	--	--	1.46587	<0.001	1.60845	<0.001	1.83802	<0.001	--	--	1.59823	<0.001	1.15644	0.0770675	1.2752	<0.001	--	--	1.14428	<0.001	1.42027	<0.001	1.42845	<0.001	--	--	1.16577	<0.001
	Lymphoid	--	--	--	--	--	--	1.34594	<0.001	--	--	--	--	--	--	1.07423	0.189805	--	--	--	--	--	--	1.21869	<0.001	--	--	--	--	--	--	0.952593	0.561388
	Myometrium	--	--	--	--	--	--	1.47458	0.00357939	--	--	--	--	--	--	1.37034	0.00136794	--	--	--	--	--	--	1.00236	0.985624	--	--	--	--	--	--	0.991205	0.976042
	Ovary	--	--	--	--	1.39081	0.0286798	1.36805	<0.001	--	--	--	--	1.05592	0.698947	1.48321	<0.001	--	--	--	--	1.0035	0.982369	1.20605	<0.001	--	--	--	--	1.04304	0.790859	0.937854	0.230568
	Pancreas	--	--	--	--	--	--	1.60003	<0.001	--	--	--	--	--	--	1.44371	<0.001	--	--	--	--	--	--	1.73912	<0.001	--	--	--	--	--	--	1.20043	0.0960894
	Prostate	--	--	0.894463	0.189337	--	--	1.09637	0.0661879	--	--	1.20421	0.0322323	--	--	1.24973	<0.001	--	--	0.813909	0.106985	--	--	1.04444	0.340936	--	--	1.05165	0.394213	--	--	1.08383	0.140626
	Skin	--	--	--	--	--	--	1.38444	0.0204965	--	--	--	--	--	--	1.38072	<0.001	--	--	--	--	--	--	1.12033	0.0975103	--	--	--	--	--	--	1.12826	0.412296
	Small Intestine	--	--	--	--	--	--	1.06792	0.366005	--	--	--	--	--	--	1.3735	<0.001	--	--	--	--	--	--	1.14728	0.0922234	--	--	--	--	--	--	1.58272	<0.001
	Soft Tissue	--	--	--	--	--	--	1.19555	0.421348	--	--	--	--	--	--	1.06508	0.707482	--	--	--	--	--	--	0.750541	0.192089	--	--	--	--	--	--	1.34411	0.111767
	Stomach	--	--	--	--	--	--	1.25416	0.0226989	--	--	--	--	--	--	1.16951	0.00166605	--	--	--	--	--	--	1.11885	0.111303	--	--	--	--	--	--	1.1499	0.0891251
	Testicle	--	--	--	--	--	--	1.27977	0.222222	--	--	--	--	--	--	1.26575	0.0952381	--	--	--	--	--	--	1.61383	0.690476	--	--	--	--	--	--	1.82795	0.031746
	Thymus	--	--	--	--	--	--	1.04923	0.901149	--	--	--	--	--	--	2.47878	0.0045977	--	--	--	--	--	--	0.862532	0.294253	--	--	--	--	--	--	0.971288	0.965517
	Thyroid	--	--	1.15166	0.00270398	--	--	0.958556	0.804693	--	--	1.04353	0.289092	--	--	0.903379	0.133428	--	--	1.13481	0.0147045	--	--	0.918145	0.183324	--	--	1.02713	0.548958	--	--	1.0942	0.535769
	Urinary	--	--	1.87344	<0.001	--	--	1.76276	<0.001	--	--	1.70508	<0.001	--	--	1.5215	<0.001	--	--	1.24568	0.0352922	--	--	1.40403	0.00590628	--	--	1.56334	<0.001	--	--	1.27689	0.207457
	Uterus	--	--	1.98119	<0.001	--	--	--	--	--	--	1.87985	0.00405115	--	--	--	--	--	--	1.77582	0.0029063	--	--	--	--	--	--	1.62667	0.00448989	--	--	--	--
	Tissue	SHMT1								SHMT2
		RNAseq_CGP		RNAseq_TCGA		Agilent_TCGA		Genelogic		RNAseq_CGP		RNAseq_TCGA		Agilent_TCGA		Genelogic
		fc	pV	fc	pV	fc	pV	fc	pV	fc	pV	fc	pV	fc	pV	fc	pV			fc:	fold change		fold changes >1.5 are highlighted in red. Fold changes <0.5 are highlighted in green.
	Adrenal	--	--	--	--	--	--	0.559444	0.0934066	--	--	--	--	--	--	1.77208	0.21978			pV:	pValue
	Blood	--	--	--	--	--	--	0.896601	0.258064	--	--	--	--	--	--	1.47222	0.0287391
	Bone	--	--	--	--	--	--	0.742153	0.259812	--	--	--	--	--	--	1.69629	0.0471708			RNAseq_CGP data:		Nat Genet. 2012 Oct;44(10):1111-6.; Nature. 2012 Aug 30;488(7413):660-4.
	Bone Marrow	--	--	--	--	--	--	0.945796	0.778807	--	--	--	--	--	--	1.01598	0.971993			GeneLogic Data:		http://www.genelogic.com/
	Brain	--	--	--	--	2.13395	0.00134906	1.59919	<0.001	--	--	--	--	2.75527	<0.001	4.24216	<0.001			TCGA Data:		http://cancergenome.nih.gov/
	Breast	--	--	0.499691	<0.001	0.584106	<0.001	0.572834	<0.001	--	--	1.74245	<0.001	1.67727	<0.001	1.42177	<0.001
	Cervix	--	--	--	--	--	--	1.53371	0.00410688	--	--	--	--	--	--	2.97491	<0.001			--		No data available for analysis.
	Colon	1.47406	<0.001	--	--	0.996717	0.955204	--	--	4.08096	<0.001	--	--	1.73352	<0.001	--	--
	Colorectal	--	--	--	--	--	--	0.839226	0.00103144	--	--	--	--	--	--	2.28409	<0.001
	Endometrium	--	--	--	--	--	--	1.45086	0.0104035	--	--	--	--	--	--	1.66549	0.00295995
	Esophagus	--	--	--	--	--	--	0.565307	0.0831391	--	--	--	--	--	--	1.37814	0.0545272
	Head and Neck	--	--	--	--	--	--	0.648829	0.207933	--	--	--	--	--	--	2.79149	0.00926972
	Head_Neck	--	--	0.46345	<0.001	--	--	--	--	--	--	1.69792	<0.001	--	--	--	--
	Heart	--	--	--	--	--	--	0.974621	0.888889	--	--	--	--	--	--	6.35821	0.0444444
	Kidney	--	--	0.460039	<0.001	--	--	0.345787	<0.001	--	--	3.57728	<0.001	--	--	2.58866	<0.001
	Liver	--	--	0.422822	0.00352627	--	--	0.439453	<0.001	--	--	1.03792	0.832626	--	--	0.891391	0.117109
	Lung	1.35864	0.00239025	1.14477	0.0083973	--	--	1.11949	0.00831516	4.04003	<0.001	3.35364	<0.001	--	--	2.87493	<0.001
	Lymphoid	--	--	--	--	--	--	0.655584	<0.001	--	--	--	--	--	--	2.07464	<0.001
	Myometrium	--	--	--	--	--	--	3.78665	<0.001	--	--	--	--	--	--	2.03674	0.00467014
	Ovary	--	--	--	--	1.28046	0.282145	1.23131	<0.001	--	--	--	--	1.74373	0.0226111	2.0897	<0.001
	Pancreas	--	--	--	--	--	--	1.25619	0.112391	--	--	--	--	--	--	1.14509	0.456258
	Prostate	--	--	0.832859	0.122876	--	--	0.866788	0.0490256	--	--	1.66959	<0.001	--	--	1.6439	<0.001
	Skin	--	--	--	--	--	--	0.730723	0.00353638	--	--	--	--	--	--	1.50945	<0.001
	Small Intestine	--	--	--	--	--	--	0.290037	<0.001	--	--	--	--	--	--	1.39529	0.0383398
	Soft Tissue	--	--	--	--	--	--	0.673412	0.1802	--	--	--	--	--	--	1.72713	0.0558847
	Stomach	--	--	--	--	--	--	0.854005	0.096156	--	--	--	--	--	--	1.56468	0.00319467
	Testicle	--	--	--	--	--	--	0.734728	0.0952381	--	--	--	--	--	--	3.23523	0.00793651
	Thymus	--	--	--	--	--	--	0.570409	0.0275862	--	--	--	--	--	--	2.39226	0.777011
	Thyroid	--	--	0.842574	0.00243254	--	--	0.761429	0.00387053	--	--	1.7259	<0.001	--	--	1.49116	0.0104504
	Urinary	--	--	1.50164	0.0908571	--	--	1.10998	0.385911	--	--	3.29206	<0.001	--	--	3.1694	<0.001
	Uterus	--	--	1.27884	0.838403	--	--	--	--	--	--	2.71509	0.00117882	--	--	--	--

## Sheet: KMPlot data
Table S6b
			for Median cut-off									Sample count:
					Breast		Ovarian		Lung
					HR	pValue	HR	pValue	HR	pValue				Breast	Ovarian	Lung
			PSMB4	FP	--	--	--	--	0.9(0.73-1.11)	0.31			FP	--	--	764
				RFS	1.56 (1.37-1.77)	5.4e-12	--	--	--	--			RFS	2880	--	--
				PFS	--	--	1.09 (0.94-1.25)	0.25	--	--			PFS	--	1171	--
				OS	1.07 (0.84-1.38)	0.57	1.24 (1.08-1.43)	0.0029	0.93 (0.8-1.08)	0.33			OS	1027	1435	1405
				DMFS	1.09 (0.87-1.35)	0.46	--	--	--	--			DMFS	1353	--	--
			SHMT2	FP	--	--	--	--	1.36 (1.1-1.68)	0.004
				RFS	1.53 (1.35-1.73)	3.9e-11	--	--	--	--
				PFS	--	--	1.01 (0.88-1.17)	0.85	--	--
				OS	1.41 (1.1-1.81)	0.0068	0.93 (0.81-1.07)	0.33	1.4 (1.2-1.63)	1.4e-05
				DMFS	1.53 (1.22-1.91)	0.00016	--	--	--	--
			FP:	First Progression
			PFS:	Progression Free Survival
			RFS:	Relapse Free Survival
			DMFS:	Distant Metastasis Free Survival
			OS:	Overall Survival
			--	No data available
